# Supplementary material for: P-type cobaltite oxide spinels enable efficient electrocatalytic oxygen evolution reaction
Source: Royal Society of Chemistry journal article supplement (doi:10.1039/d1ma00157d), 2021-01-01
Supplement: d1ma00157d1.pdf [file d1ma00157d1.pdf]

## Supporting Information: P-type Cobaltite Oxide Spinel Enables Efficient Electrocatalytic Oxygen Evolution Reaction

David Doppelbauer,<sup>a,b</sup> Abdalaziz Aljabour,<sup>a</sup> Halime Coskun,<sup>a</sup> He Sun,<sup>a,c</sup> Markus Gusenbauer,<sup>a,b</sup> Julia Lumetzberger,<sup>b</sup> Daniel Primetzhofer,<sup>d</sup> Bogdan Faina,<sup>b</sup> Jiri Duchoslav,<sup>e</sup> Matthias Kehr,<sup>e</sup> David Stifter,<sup>e</sup> Heiko Groiss,<sup>e,f</sup>, Verena Ney,<sup>b</sup> Andreas Ney,<sup>b</sup> and Philipp Stadler<sup>\*a,c</sup>

### Table of Content

- Figure SS1: Samples used for OER characterization
- Figure SS2: Panel of scanning electron microscopy (SEM) in titanium mesh (aspect ratio of 0.75 projected versus geometric area).
- Figure SS3: Al:ZnO-based sample (stack: sapphire (0001) - Al:ZnO -  $\text{Zn}_{1.2}\text{Co}_{1.8}\text{O}_{3.5}$ ) used for oxygen evolution reaction.
- Figure SS4: Conductivity of Al:ZnO (2% Al) versus temperature and the sheet resistance at 300K (room temperature).
- Figure SS5: Ti-mesh calibration X-ray diffraction pattern (blank Ti-mesh and Ti-mesh plus  $\text{Zn}_{1.2}\text{Co}_{1.8}\text{O}_{3.5}$ ).
- Figure SS6: Detailed diffraction patterns of  $\text{Zn}_{1.2}\text{Co}_{1.8}\text{O}_{3.5}$ : (222), (333) and (444) reflections on sapphire and Al:ZnO.
- Figure SS7: FWHM/Scherrer analysis of the diffraction peaks of the (222) Zn-Co-O spinel patterns (semi-log scale) on following substrates:  $\text{TiO}_2$  (rutile, tetragonal), Ti-mesh with native  $\text{TiO}_2$ ,  $\text{Al}_2\text{O}_3$  (sapphire 0001, hexagonal) and Al:ZnO/sapphire (0001).
- Figure SS8: Complementary TEM cross section showing the columnar growth of  $\text{Zn}_{1.2}\text{Co}_{1.8}\text{O}_{3.5}$  on Ti-mesh.
- Figure SS9: Zoom in high-resolution cross-sectional TEM in single column of  $\text{Zn}_{1.2}\text{Co}_{1.8}\text{O}_{3.5}$  (25 nm grain size).
- Table S1: Diffraction parameters from Scherrer analysis as derived from the measurements shown in Figure SS7.
- Figure SS10: X-ray reflectivity to  $\text{Zn}_{1.2}\text{Co}_{1.8}\text{O}_{3.5}$  Hall specimen yielding 165 nm.

<sup>a</sup> Institute of Physical Chemistry, Johannes Kepler University Linz, Altenbergerstrasse 69, 4040 Linz, Austria; E-mail: philipp.stadler@jku.at

<sup>b</sup> Institute of Semiconductor and Solid State Physics, Johannes Kepler University Linz, Altenbergerstrasse 69, 4040 Linz, Austria.

<sup>c</sup> Linz Institute of Technology, Johannes Kepler University Linz, Altenbergerstrasse 69, 4040 Linz, Austria.

<sup>d</sup> Department of Physics and Astronomy, Uppsala University, Box 516, 751 20, Uppsala, Sweden.

<sup>e</sup> Center for Surface and Nanoanalytics, Johannes Kepler University Linz, Altenbergerstrasse 69, 4040 Linz, Austria.

<sup>f</sup> Christian Doppler Laboratory for Nanoscale Phase Transformations, Center for Surface and Nanoanalytics, Johannes Kepler University Linz, Altenberger Str. 69, 4040 Linz, Austria.

† Electronic Supplementary Information (ESI) available: [details of any supplementary information available should be included here]. See DOI: 00.0000/00000000.

- Table S2: Electrochemical impedance spectra: summary of parameters (membrane and electrolyte resistance and capacitance) as shown in Figure SS14.
- Table S3: Statistical overview of electrocatalytic  $\text{Zn}_{1.2}\text{Co}_{1.8}\text{O}_{3.5}$  anodes relating to Figure SS10.
- Figure SS11: Cyclic voltammetry (CV) and 50 h chronoamperometry on Au/Ti-mesh substrate.
- Figure SS12: Corrosion effect on Ti-mesh (anodic growth of  $\text{TiO}_2$ ).
- Figure SS13: Detailed Tafel-slope analysis of as-measured current versus overpotential  $\eta$ .
- Figure SS14: Electrochemical impedance spectroscopy and corresponding equivalent circuit to derive the cell parameters (electrolyte and membrane resistance).
- Figure SS15: Linear sweep voltammograms to large current densities.
- Figure SS16: Determination of the electrochemical surface area by linear sweep voltammetry in organic electrolyte (acetonitrile, 0.1 M TBA- $\text{PF}_6$ ).
- Figure SS17: Schematic of the electrochemical H-cell.
- Figure SS18: Statistical evaluation of different experiments carried out on the electrocatalytic anodes of  $\text{Zn}_{1.2}\text{Co}_{1.8}\text{O}_{3.5}$  grown on (left) Ti-mesh and (right) Al:ZnO.
- Figure SS19: after-electrolysis XPS survey of  $\text{Zn}_{1.2}\text{Co}_{1.8}\text{O}_{3.5}$  on titanium with a Zn:Co ratio at approx. 0.65.
- Figure SS20: Hall measurement outline/summary parameters of  $\text{Zn}_{1.2}\text{Co}_{1.8}\text{O}_{3.5}$  Hall specimen - van der Pauw specimen; sample grown on sapphire (0001)).
- Figure SS21: Proof of Ohmic-contact to the sample specimen prior Hall-characterization.
- Figure SS22: Details of resistivity measurement (at 300K) of  $\text{Zn}_{1.2}\text{Co}_{1.8}\text{O}_{3.5}$  Hall specimen using the van-der-Pauw geometry.
- Figure SS23: Corresponding Hall-characterization (at 300K) using AC-Hall method supported by LakeShore HMS 8400 cryogenic probe station: AC-magnetic fields allow to probe Hall-voltages in low-mobility samples such as the defect-controlled  $\text{Zn}_{1.2}\text{Co}_{1.8}\text{O}_{3.5}$ .
- Figure SS24: Gas-chromatogram (He) of the anode headspace before/after 1h electrolysis.

Additional tables and equations

Table 1 FWHM analysis of p-doped Zn-Co spinels.

| substrate                          | peak spinel (222) / 2θ | FWHM / 2θ | τ* / nm |
|------------------------------------|------------------------|-----------|---------|
| sapphire                           | 38.0 deg               | 0.25 deg  | 31.8    |
| rutile                             | 38.092 deg             | 0.25 deg  | 32      |
| Ti-mesh (native TiO <sub>2</sub> ) | 38.092 deg             | 0.28 deg  | 28.6    |
| Al:ZnO (wurtzite)                  | 38.3 deg               | 0.39 deg  | 21      |

\*Scherrer analysis.

Table 2 Electrochemical impedance spectra of electrolysis cell.

| WE                                                             | CE | R <sub>ele.</sub> / Ω cm <sup>-2</sup> | R <sub>me.</sub> / Ω cm <sup>-2</sup> | C / μF cm <sup>-2</sup> |
|----------------------------------------------------------------|----|----------------------------------------|---------------------------------------|-------------------------|
| Pt                                                             | Pt | 1.8                                    | 16                                    | 27                      |
| Zn <sub>1.2</sub> Co <sub>1.8</sub> O <sub>3.5</sub> /Ti-mesh* | Ni | 2.0                                    | 16                                    | 21.3                    |

\* Including Ti-corrosion effects. \*\* WE = working electrode, CE = counter electrode, ele. = electrolyte, me. = membrane.

Table 3 Statistical data.

| Anode                                                         | η <sub>av.</sub> * / V | η <sub>av.</sub> / V | η <sub>min.</sub> / V | standard deviation / mV |
|---------------------------------------------------------------|------------------------|----------------------|-----------------------|-------------------------|
| Zn <sub>1.2</sub> Co <sub>1.8</sub> O <sub>3.5</sub> /Ti-mesh | 0.35                   | 0.363                | 0.345                 | ±6                      |
| Zn <sub>1.2</sub> Co <sub>1.8</sub> O <sub>3.5</sub> /Al:ZnO  | 0.41                   | 0.425                | 0.39                  | ±7                      |

\* at 10 mA cm<sup>-2</sup>

Appendix: Scherrer analysis

The domain size (τ) is calculated using the Scherrer formula:

$$\tau = \frac{K \cdot \lambda}{\beta \cdot \cos \theta}$$

(1)

with the excitation length λ = 0.15406 nm (Cu K<sub>α1</sub>), the shape factor K = 0.89 (spherical), the Bragg angle θ (deg) of the peak and the (radial) peak full width (at half maximum, FWHM, deg, Figure S7).

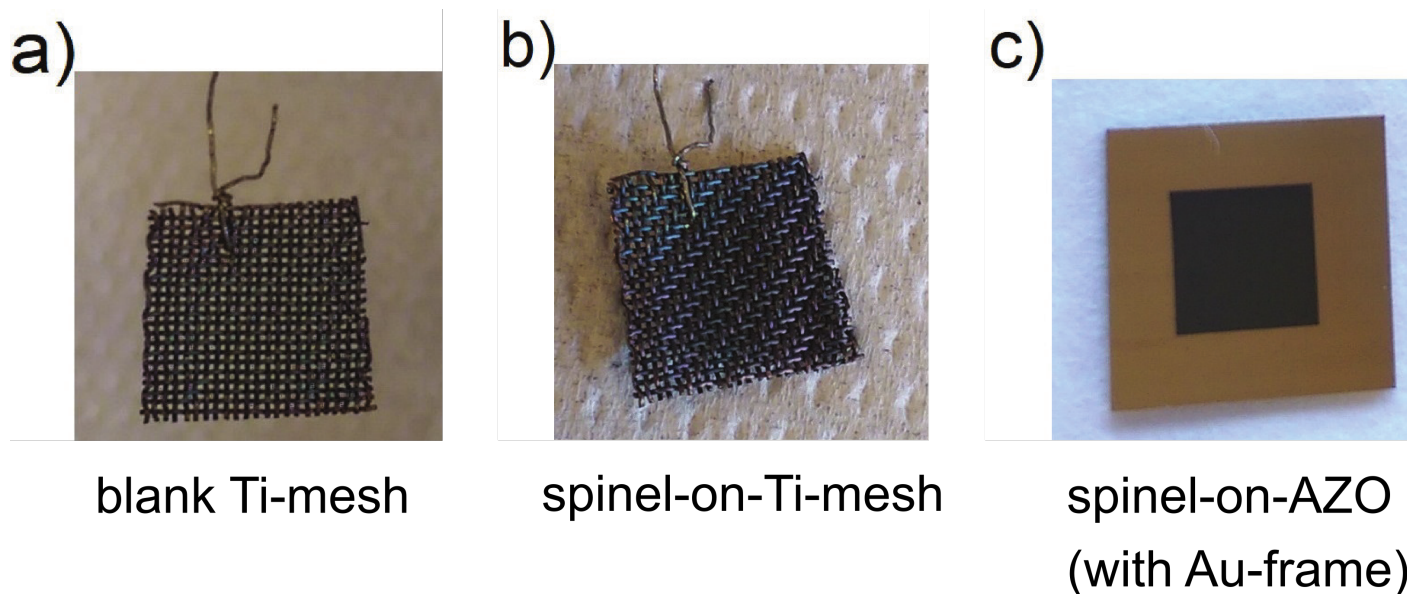

**Fig. S1 Samples used for OER characterization:** blank Ti-mesh, Ti-mesh covered with  $\text{Zn}_{1.2}\text{Co}_{1.8}\text{O}_{3.5}$  and patterned substrate on sapphire (0001) with Al:ZnO as conducting layer buried under  $\text{Zn}_{1.2}\text{Co}_{1.8}\text{O}_{3.5}$  and Au, respectively.

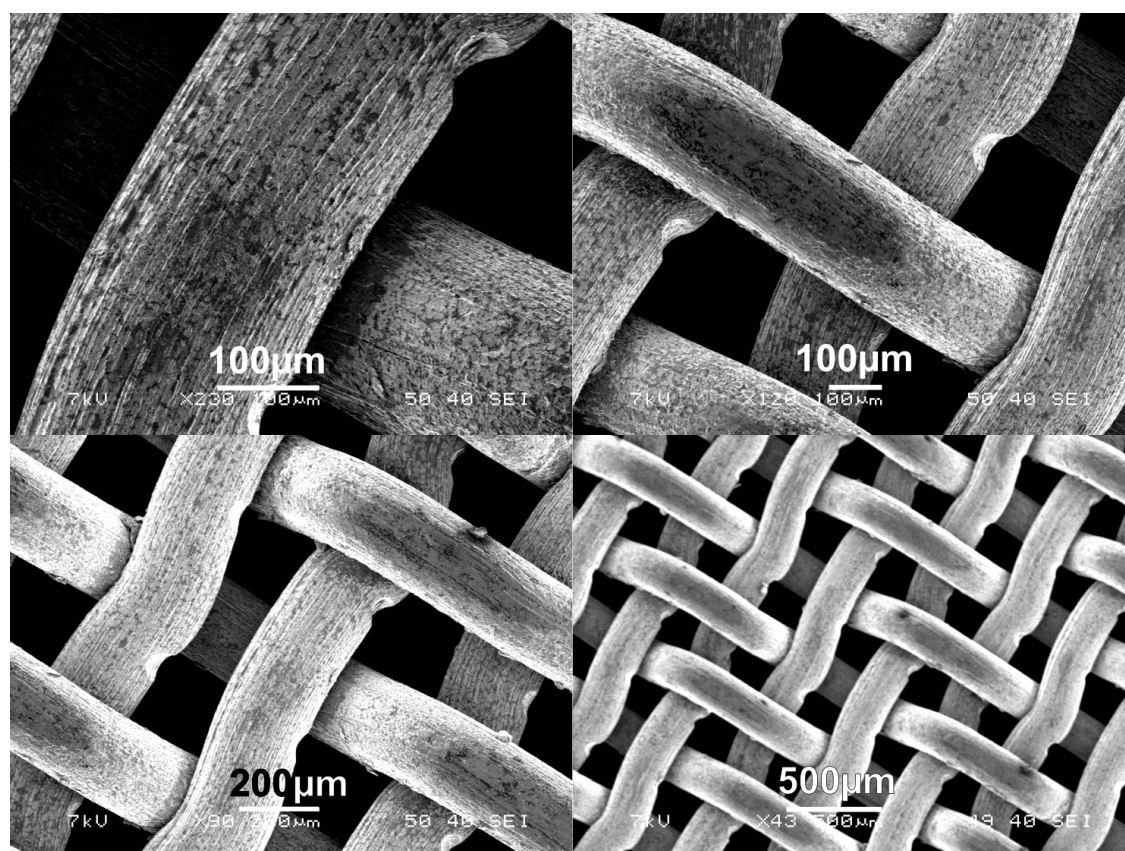

**Fig. S2 SEM images of the Ti-mesh:** We show the geometric factor of 0.75 (projected versus geometric area).



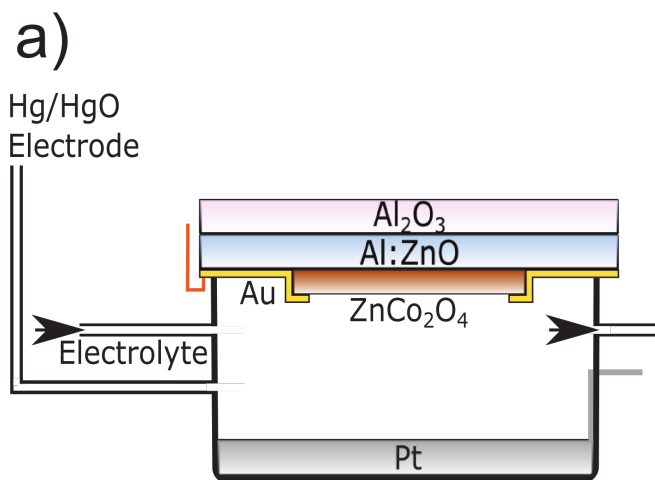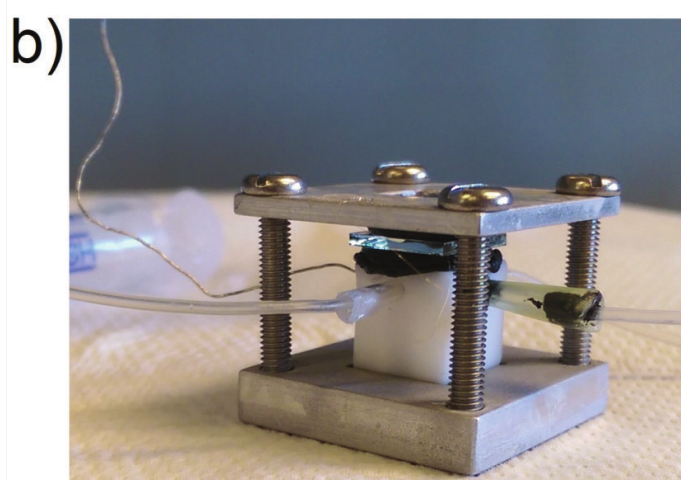

**Fig. S3 Al:ZnO as conductive substrate for OER:** high-quality Al:ZnO is co-deposited prior the Zn-Co-O spinel on sapphire (0001). To protect the Al:ZnO from dissolution in alkaline media, the conducting oxide is covered in the center with spinel  $\text{Zn}_{1.2}\text{Co}_{1.8}\text{O}_{3.5}$  (active area) and, concomitantly, on the edges with Au (schematic in (a)). In (b), the actual electrolysis cell used for characterization is depicted.

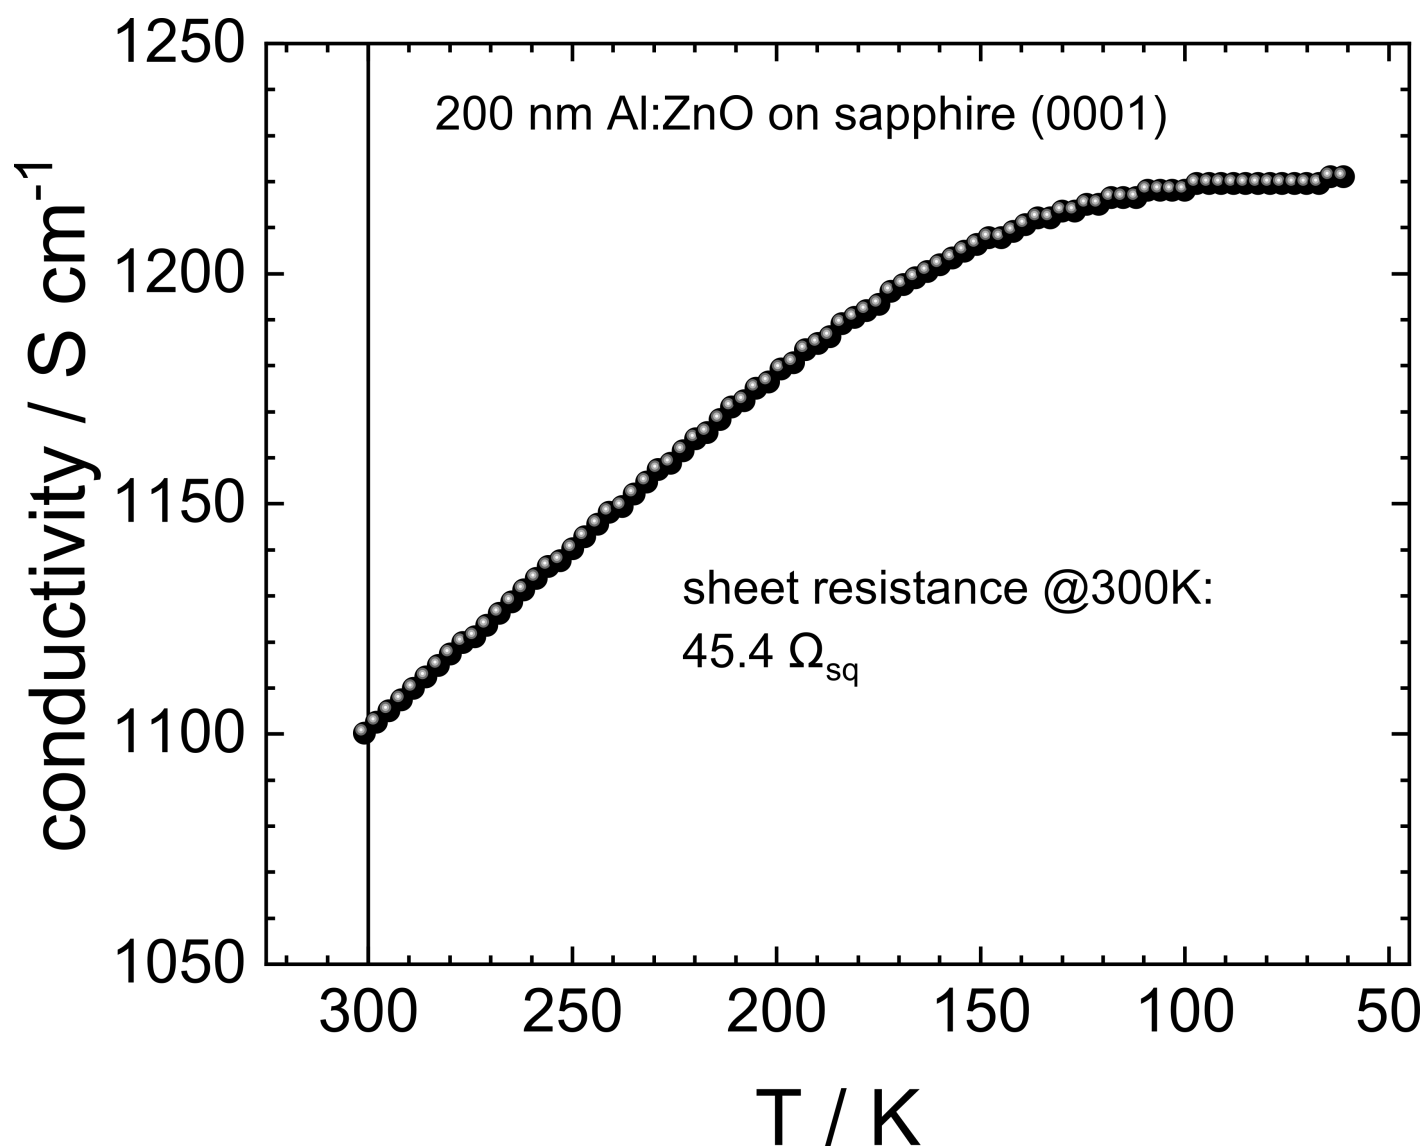

**Fig. S4 Conductivity of Al:ZnO on sapphire (0001):** Prior the catalytic  $\text{Zn}_{1.2}\text{Co}_{1.8}\text{O}_{3.5}$ , 200 nm Al:ZnO are deposited (doping at approx. 2% Al) resulting in a conductivity of  $1100 \text{ S cm}^{-1}$  and a sheet resistance of  $45.4 \Omega$  per square.

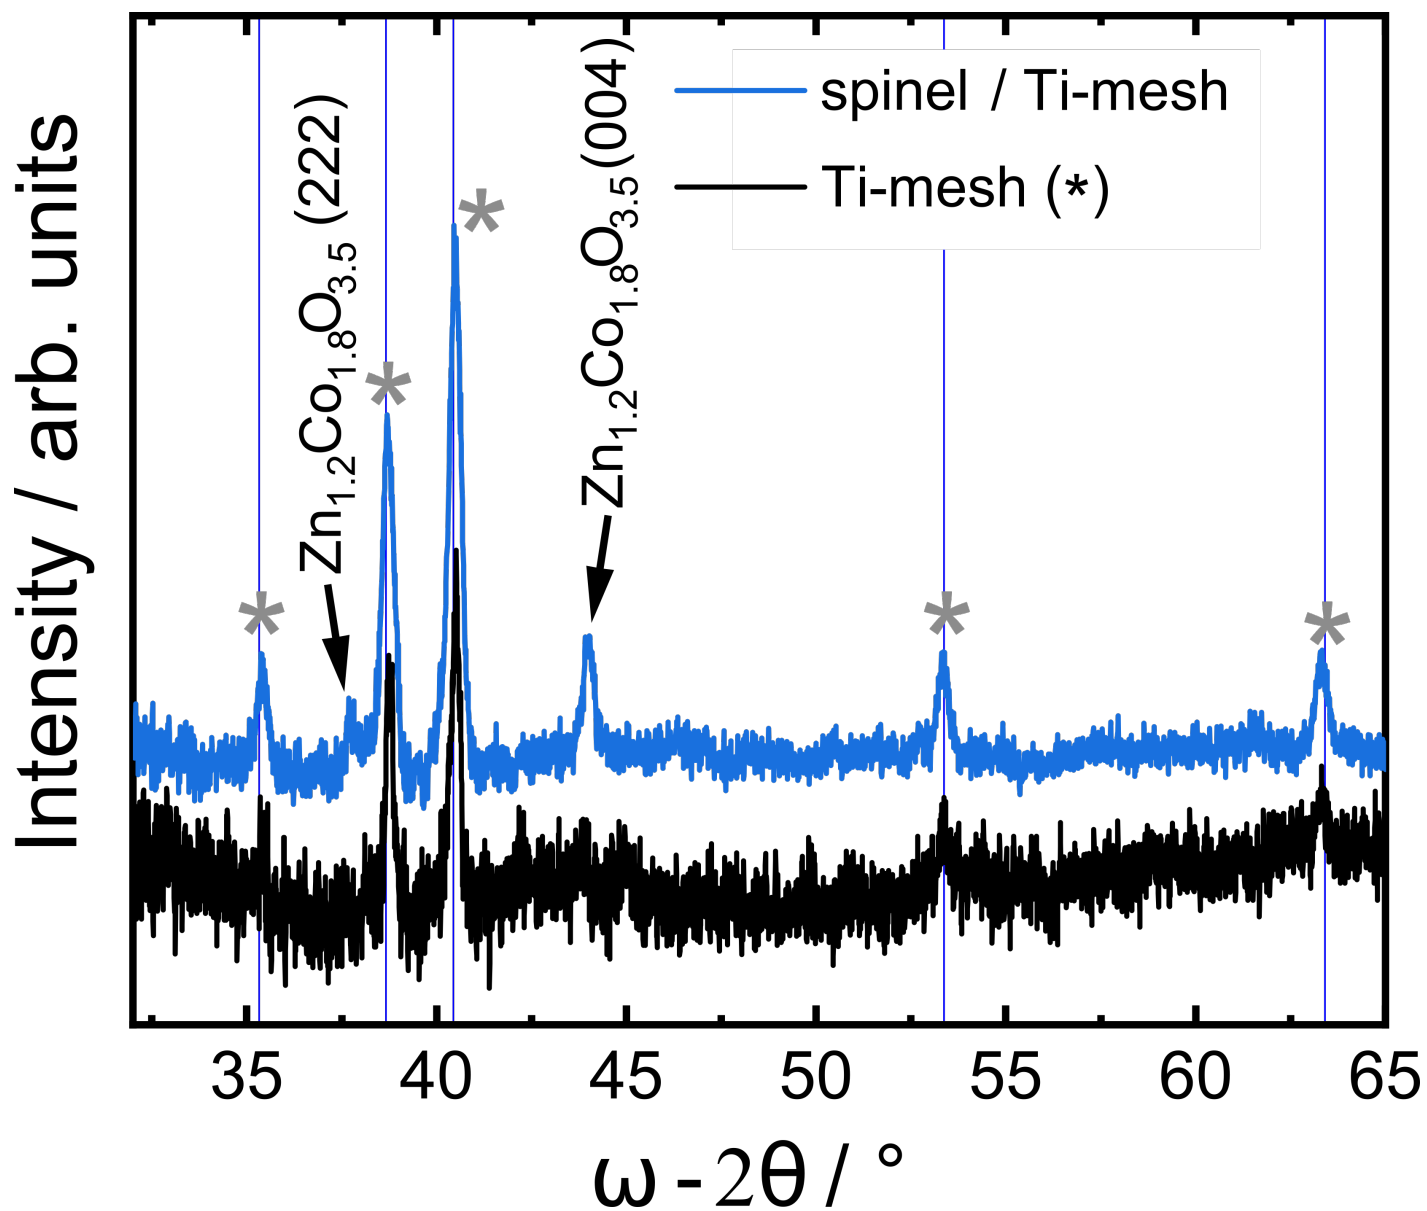

Fig. S5 Ti-mesh calibration: X-ray diffraction patterns of Ti-mesh with and without  $\text{Zn}_{1.2}\text{Co}_{1.8}\text{O}_{3.5}$ .

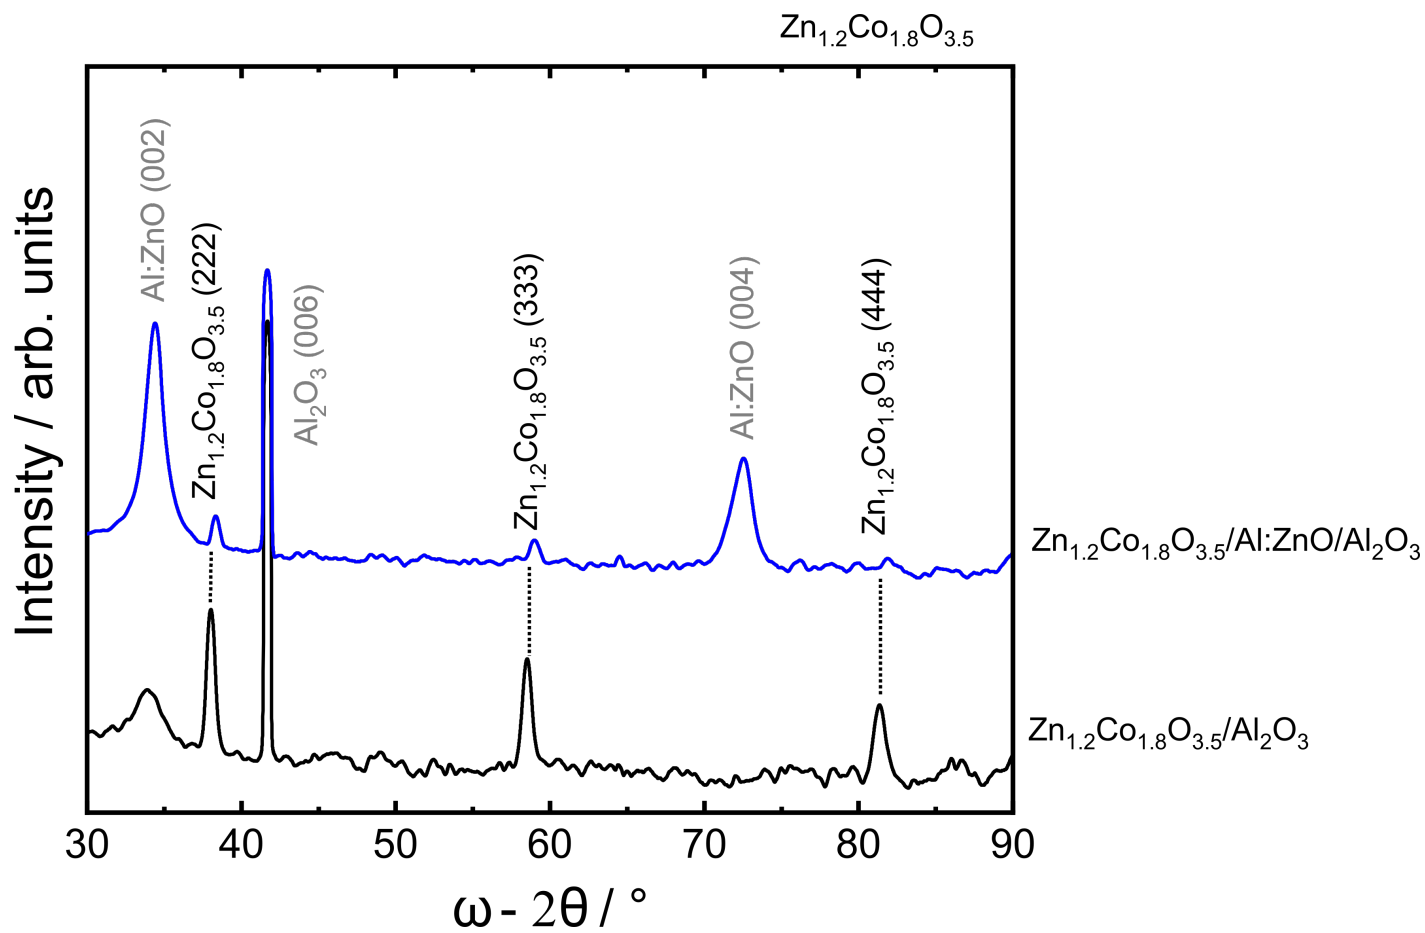

**Fig. S6 Detailed diffraction patterns of  $\text{Zn}_{1.2}\text{Co}_{1.8}\text{O}_{3.5}$ : (222), (333) and (444) pattern on sapphire and Al:ZnO.**

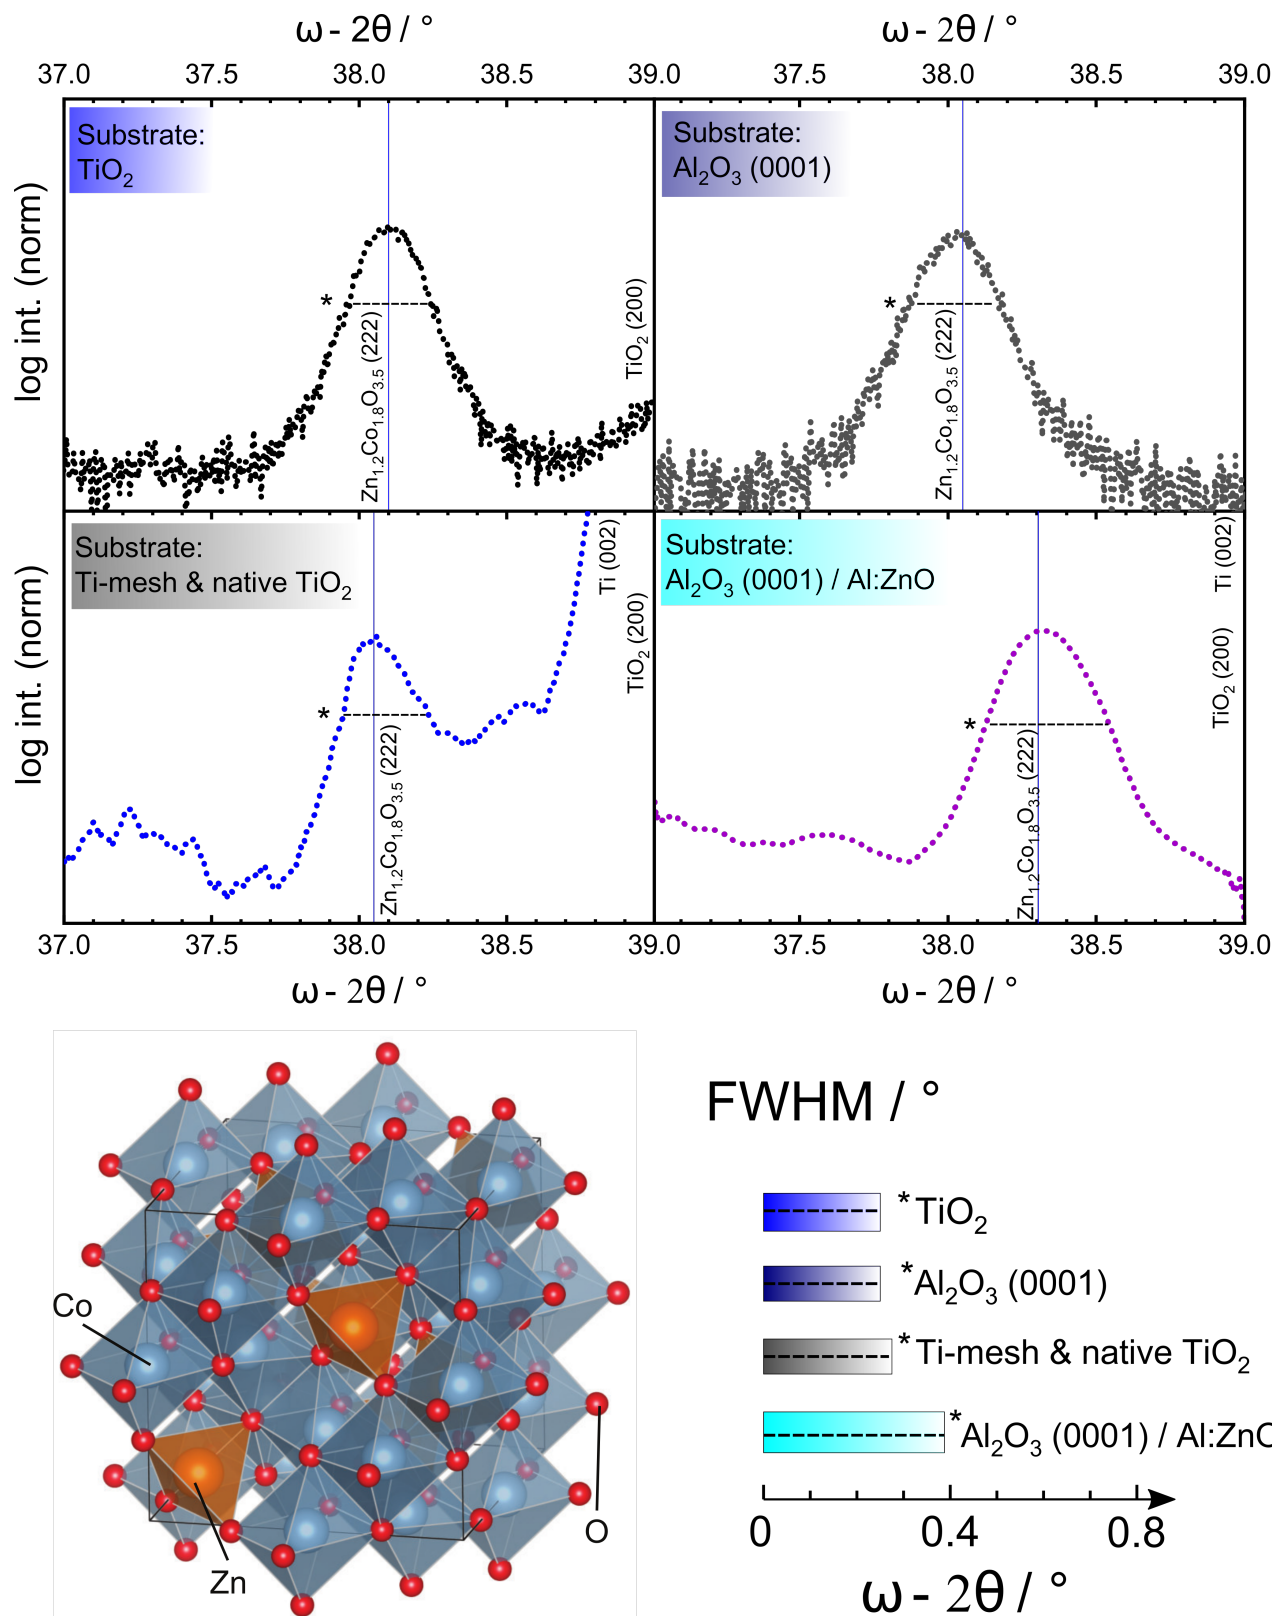

**Fig. S7 Comparison of the FWHM/Scherrer analysis:** Diffraction peaks of the (222) Zn-Co-O spinel pattern (semi-log scale) on following substrates:  $\text{TiO}_2$  (rutile, tetragonal) and  $\text{Al}_2\text{O}_3$  (sapphire 0001, hexagonal) as the reference substrates; Ti-mesh with native  $\text{TiO}_2$  and Al:ZnO (on sapphire 0001, hexagonal) used as electrocatalytic anodes. On the bottom. the spinel we include the structure of the Zn-Co-O system and the corresponding full widths according to the diffraction pattern. From that we calculated the average domain size  $\tau$  according to equation 1 summarized in Table 1.



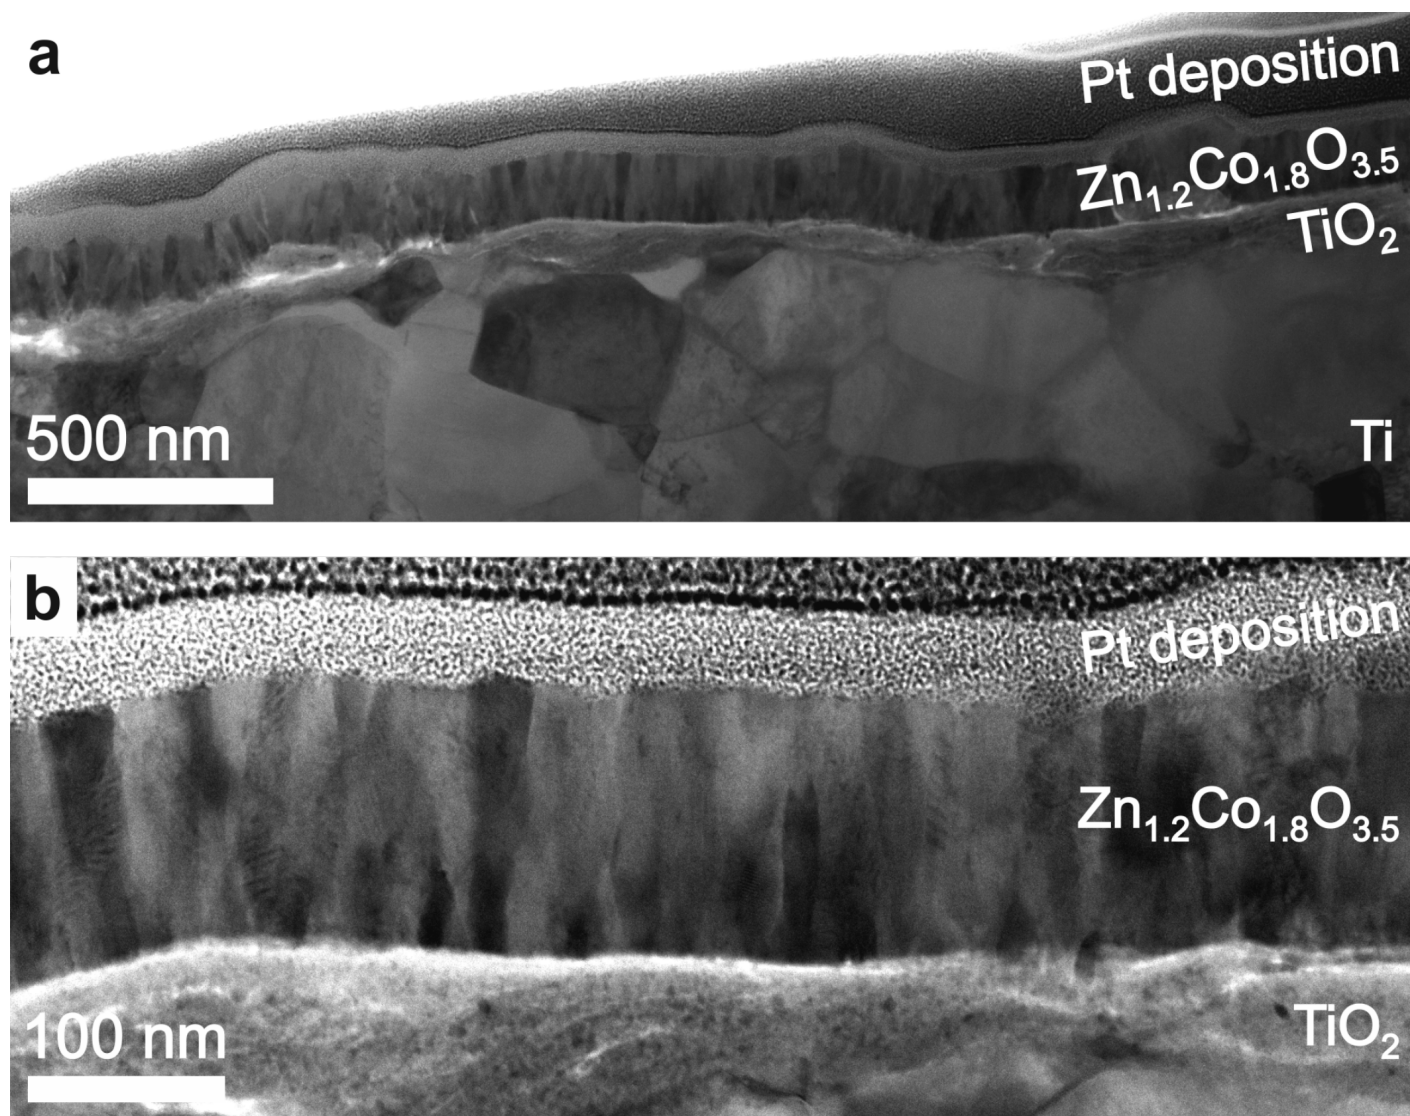

**Fig. S8 Structure of the Ti-mesh by bright field STEM:** (a) the overview displays the homogeneous thick  $\text{Zn}_{1.2}\text{Co}_{1.8}\text{O}_{3.5}$  on top of the  $\text{TiO}_2$  covered Ti-mesh. (b) Most of the columnar grains reach from the  $\text{TiO}_2$  to the surface with diameters in the region from 10-40 nm.

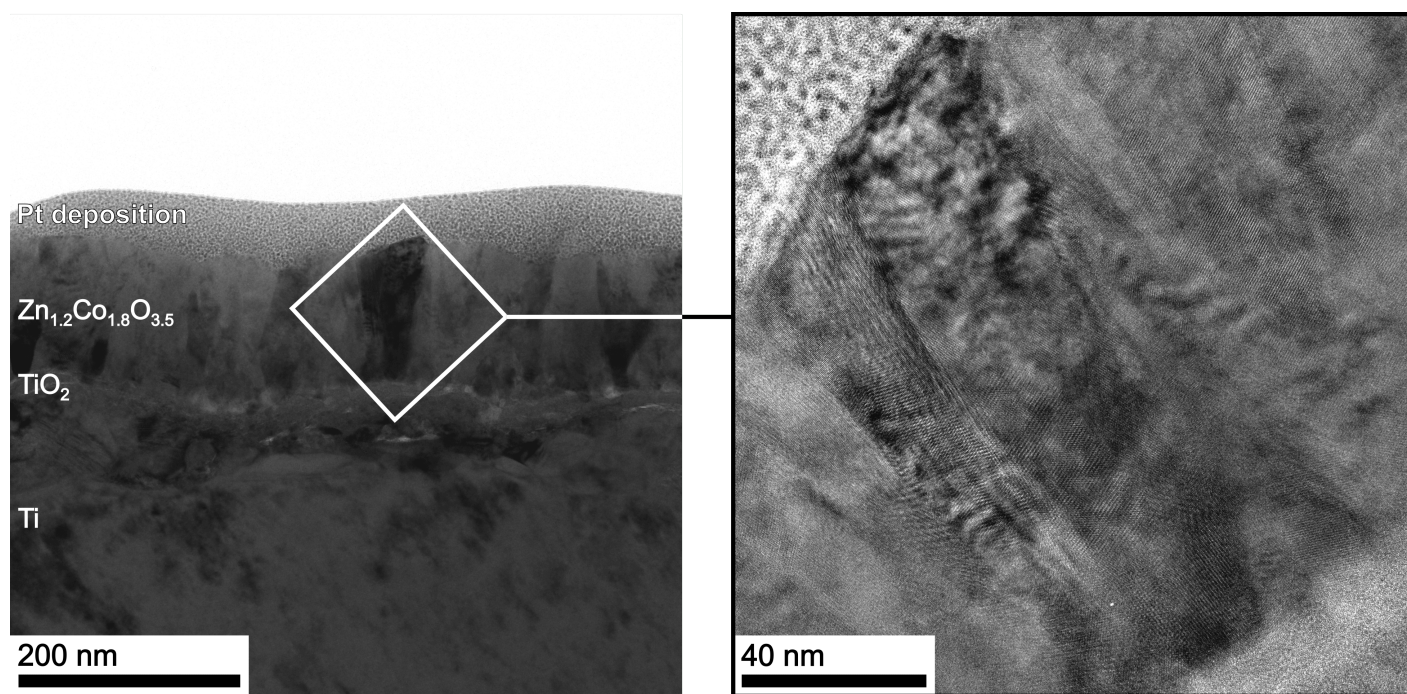

**Fig. S9 TEM lattice image of the  $\text{Zn}_{1.2}\text{Co}_{1.8}\text{O}_{3.5}$  layer:** The lattice fringes of the marked grain and its neighboring grains are well visible in the right-hand high-resolution phase contrast image proving the good crystal quality of the active  $\text{Zn}_{1.2}\text{Co}_{1.8}\text{O}_{3.5}$  layer. The average domain size  $\tau$  corresponds to the XRD Scherrer analysis (Figure S7 and Table S1).

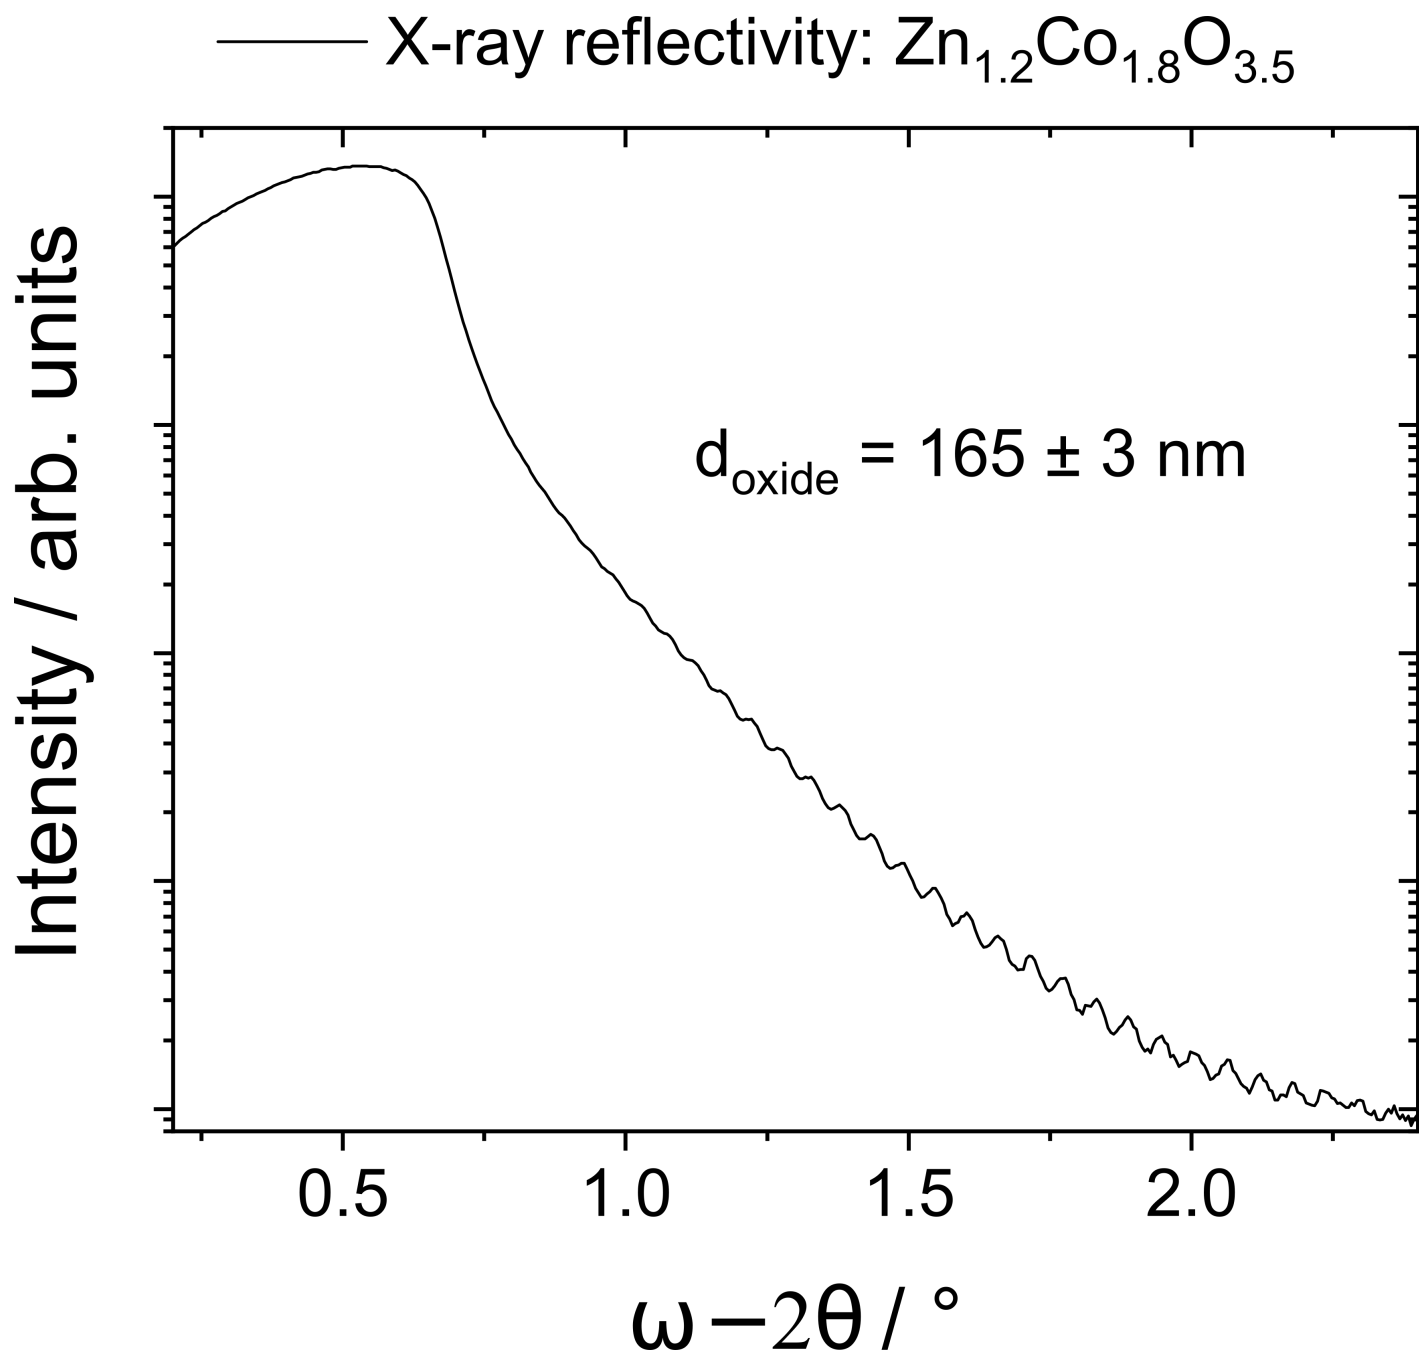

**Fig. S10 X-ray reflection measurement on Hall-specimen:**  $\text{Zn}_{1.2}\text{Co}_{1.8}\text{O}_{3.5}$  grown on sapphire (0001) for the van-der-Pauw Hall specimen yielding  $165 \pm 3 \text{ nm}$ .

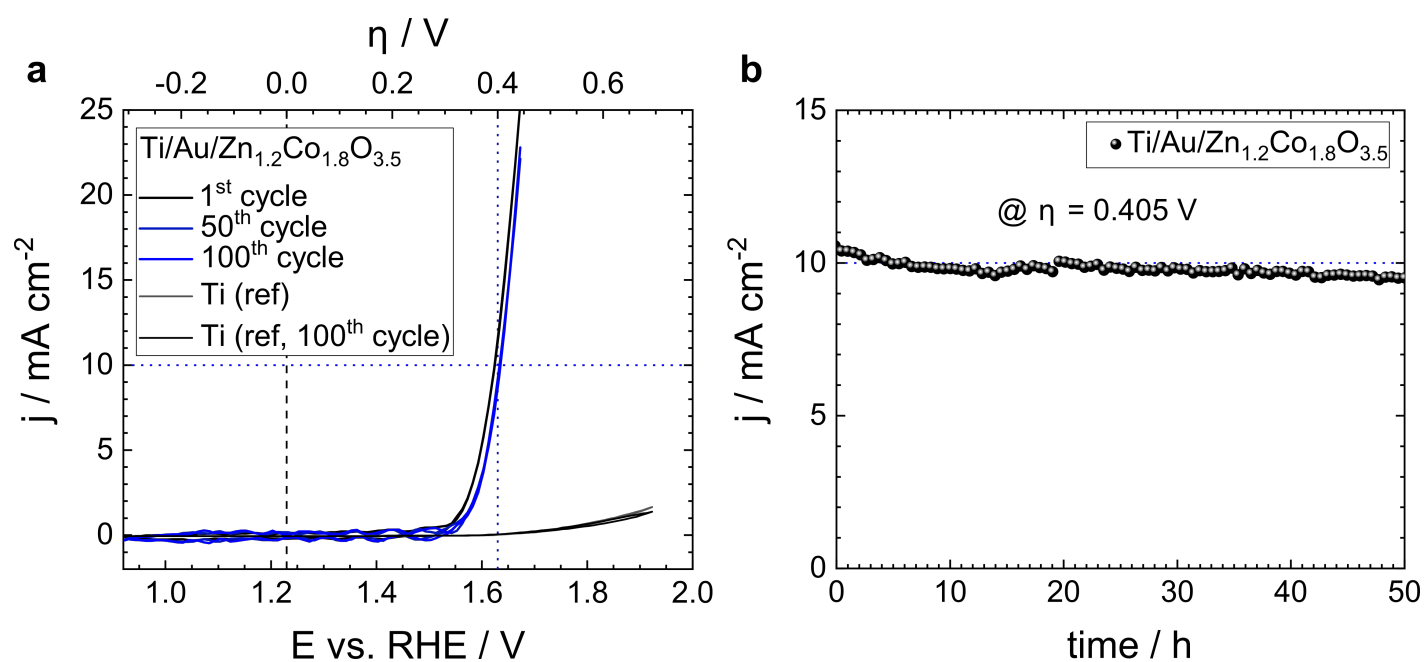

**Fig. S11 Electrochemical characterization of  $\text{Ti}/\text{Au}$  (10 nm) /  $\text{Zn}_{1.2}\text{Co}_{1.8}\text{O}_{3.5}$ .** (a) Cyclic voltammetry and (b) chronoamperometry for 50 h to test the stability at  $10 \text{ mA cm}^{-2}$ .

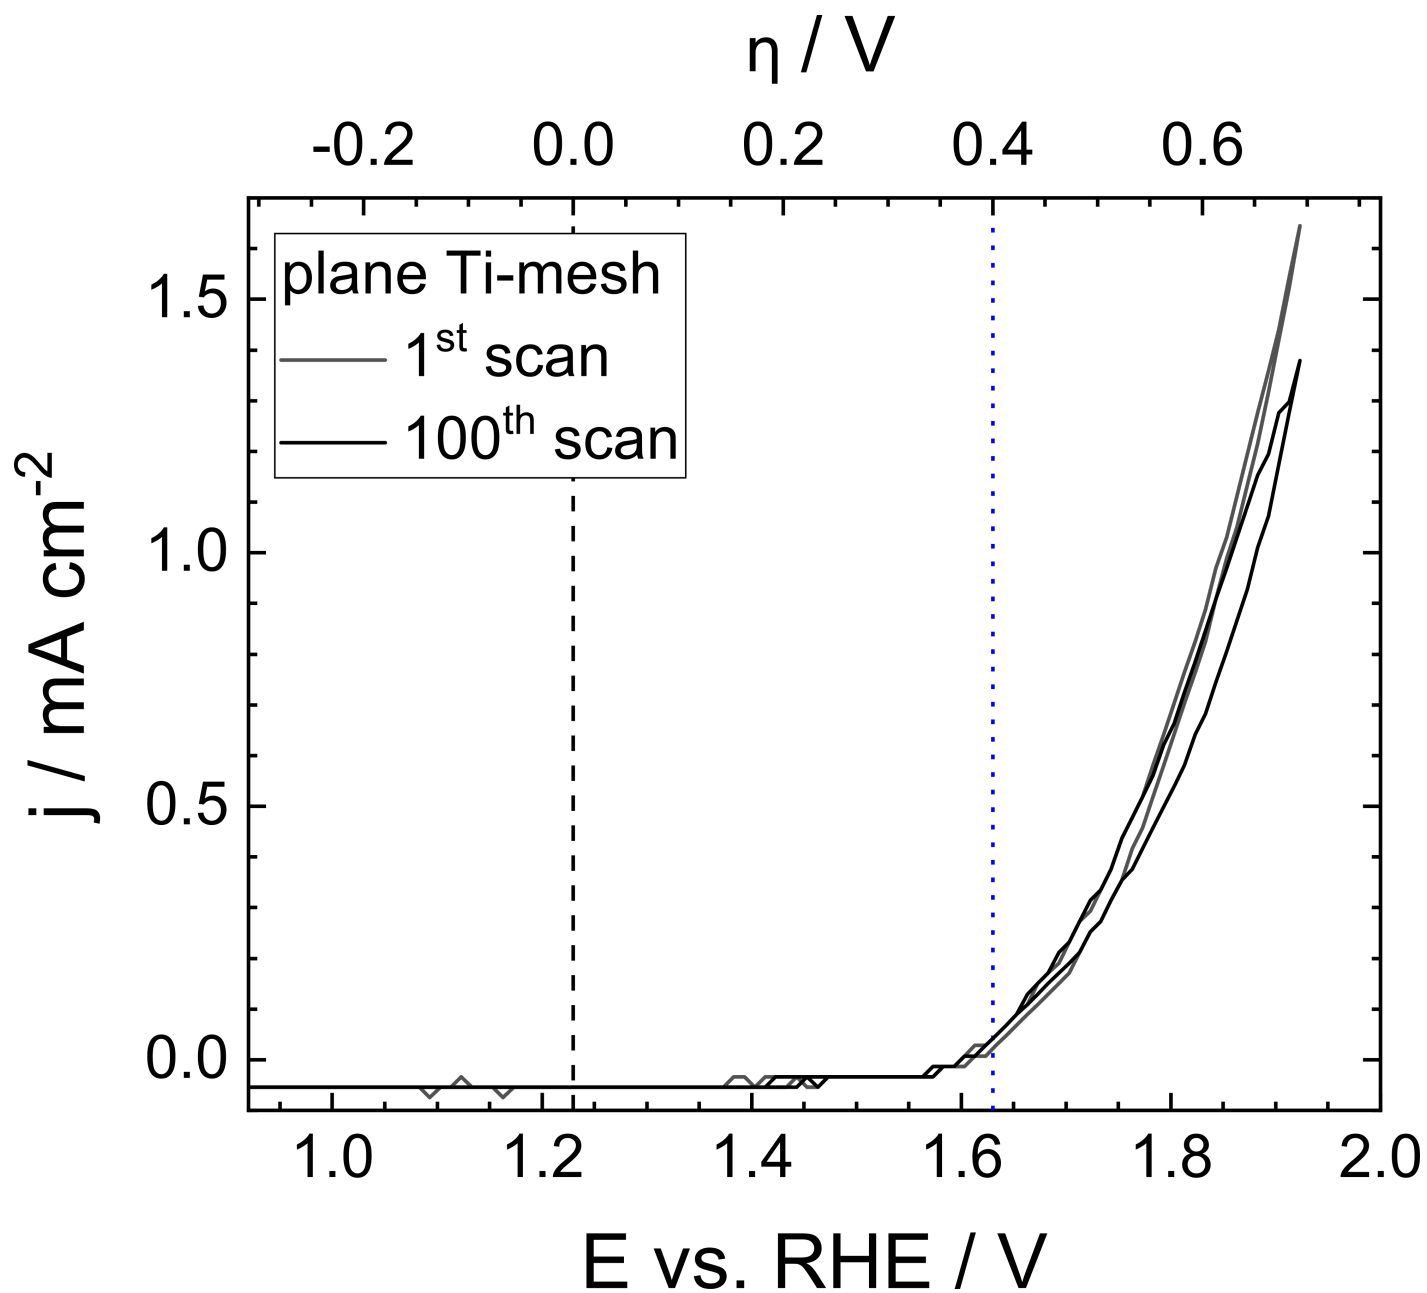

**Fig. S12 Ti-corrosion:** Cyclic voltammogram reveals an increase of the anodic current after cycling at anodic potentials.



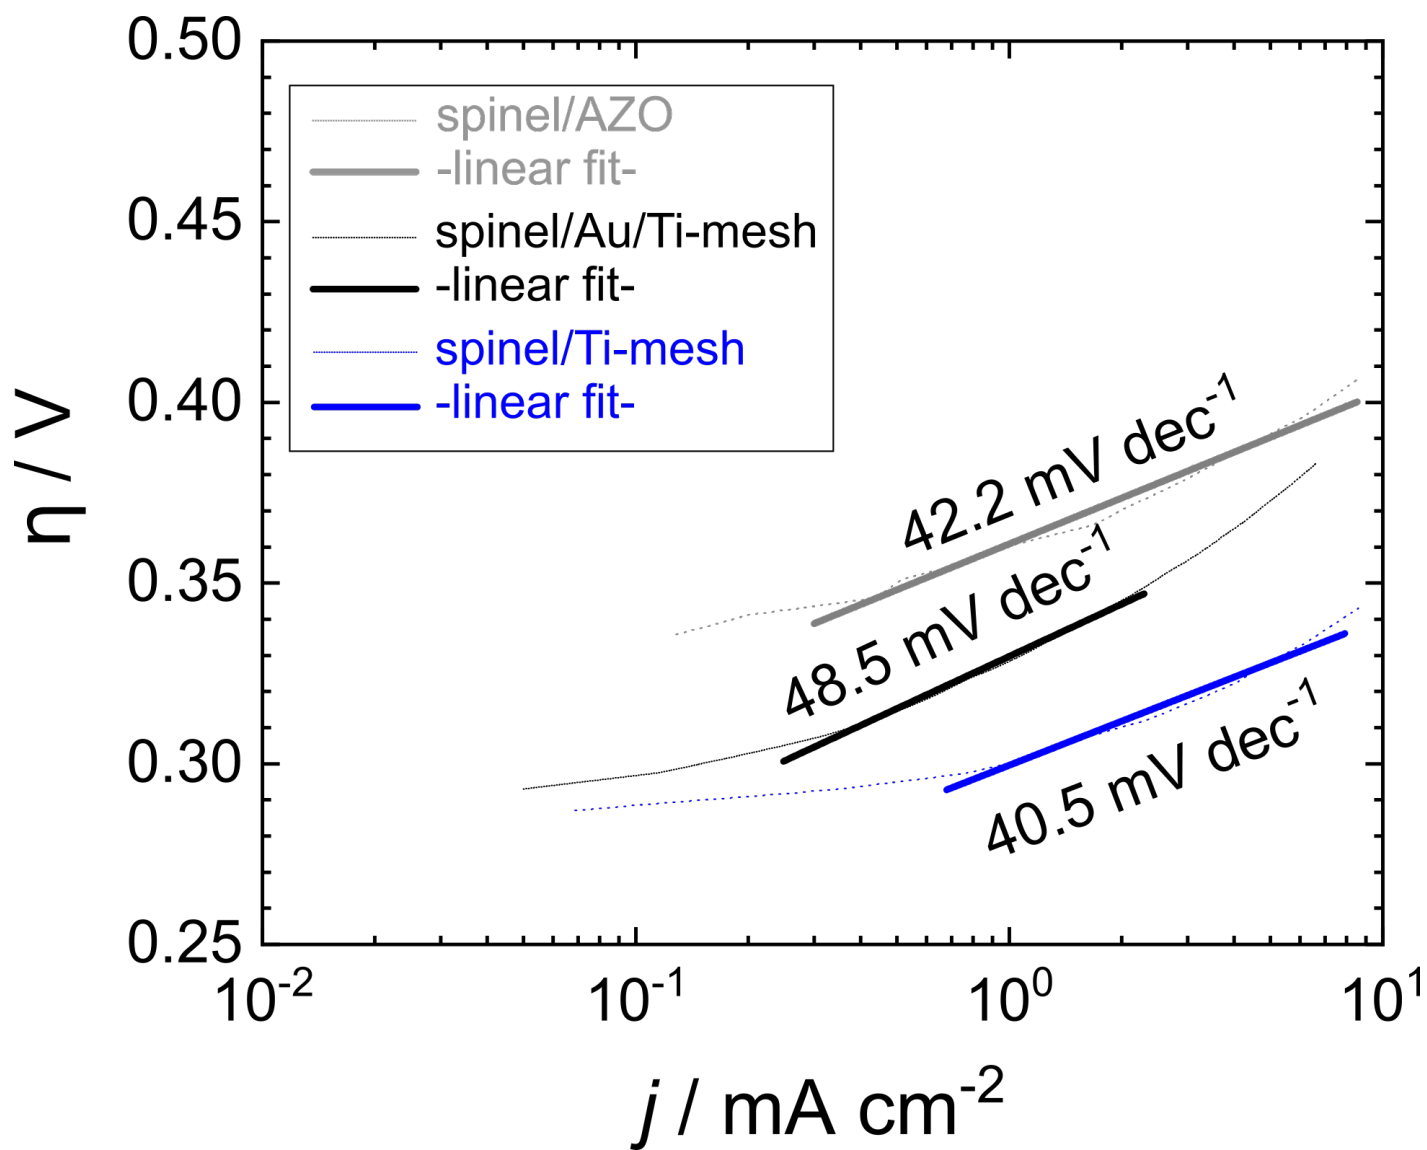

**Fig. S13 Detailed Tafel analysis:** Extraction of Tafel slopes in the linear regime of the semilogarithmic Tafel-plots.

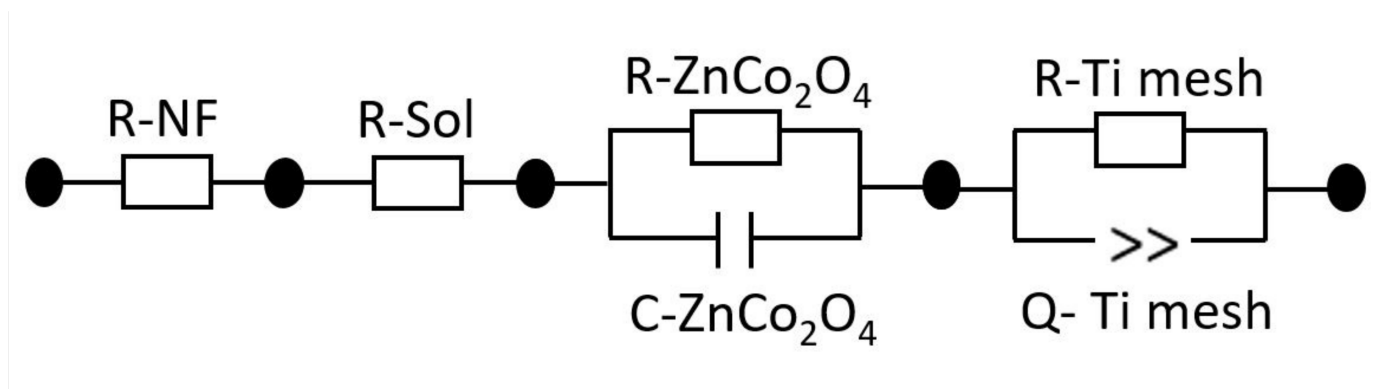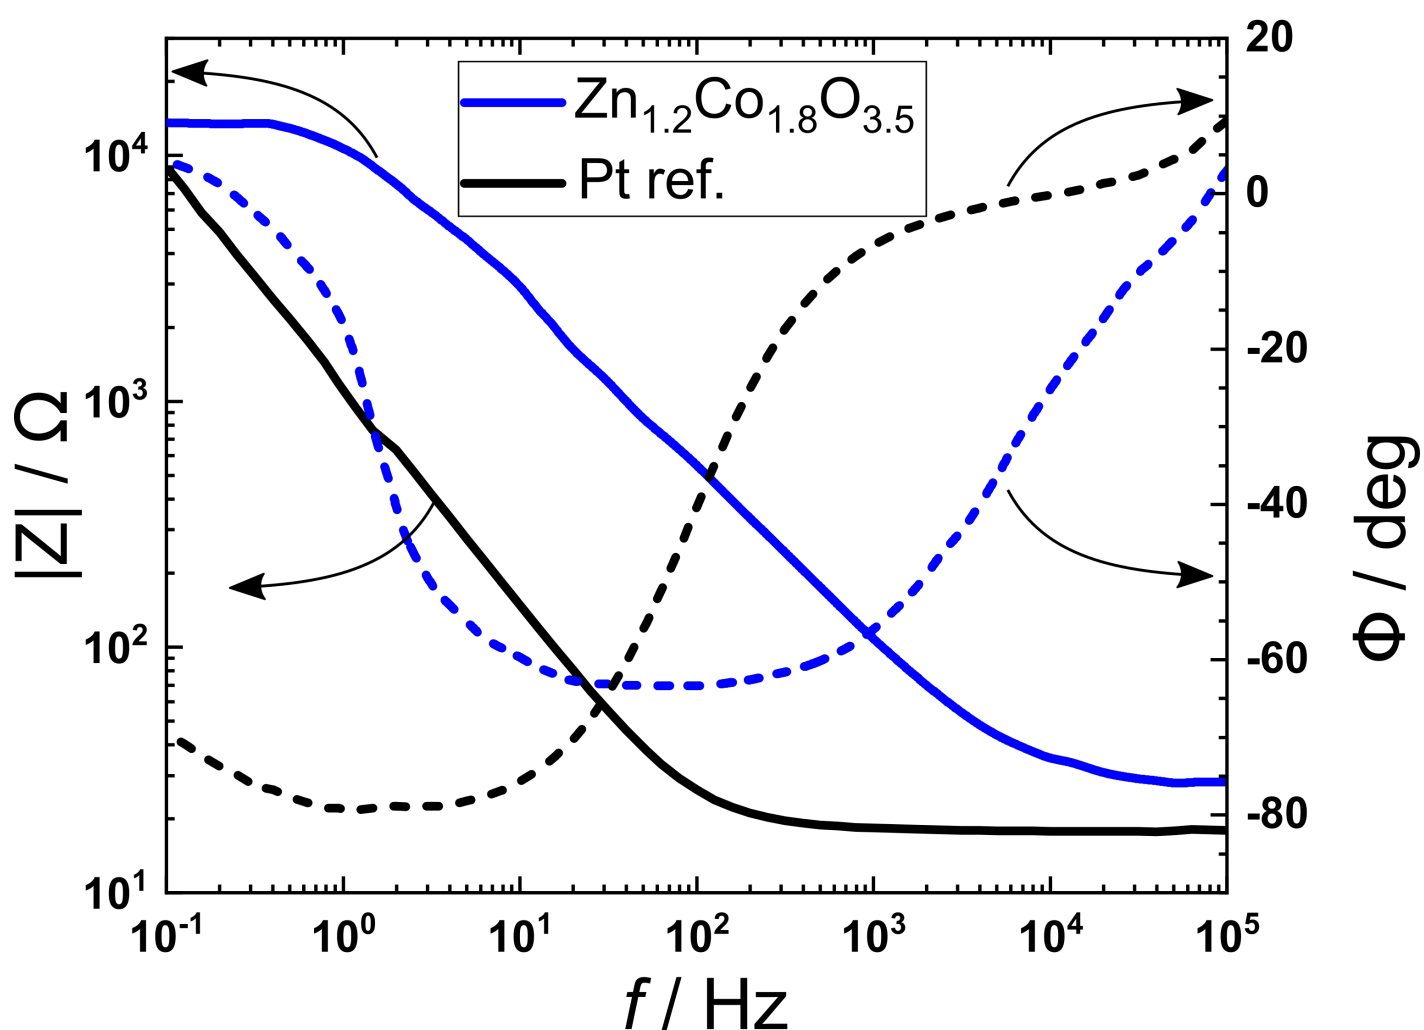

**Fig. S14 Electrochemical impedance spectroscopy:** The electrochemical cell constants ( $R_{\text{electrolyte}}$ ,  $R_{\text{membrane}}$ , capacitance) are presented in Table 2.

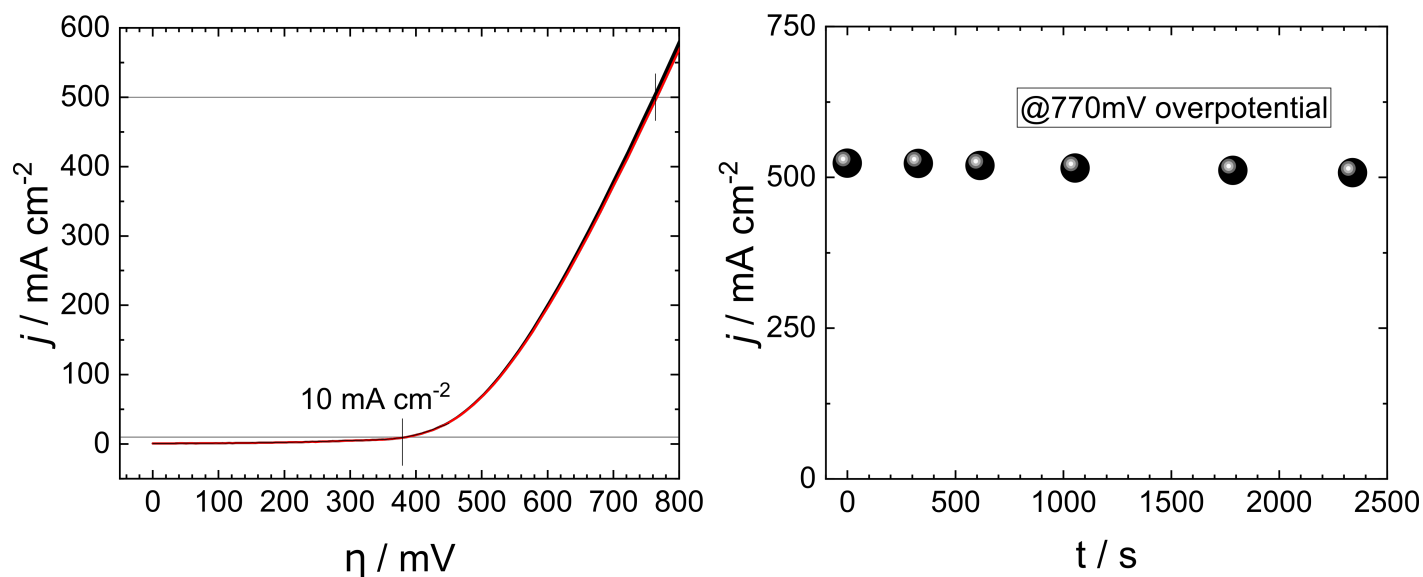

Fig. S15 Linear sweep voltammogram exceeding  $500 \text{ mA cm}^{-2}$ .

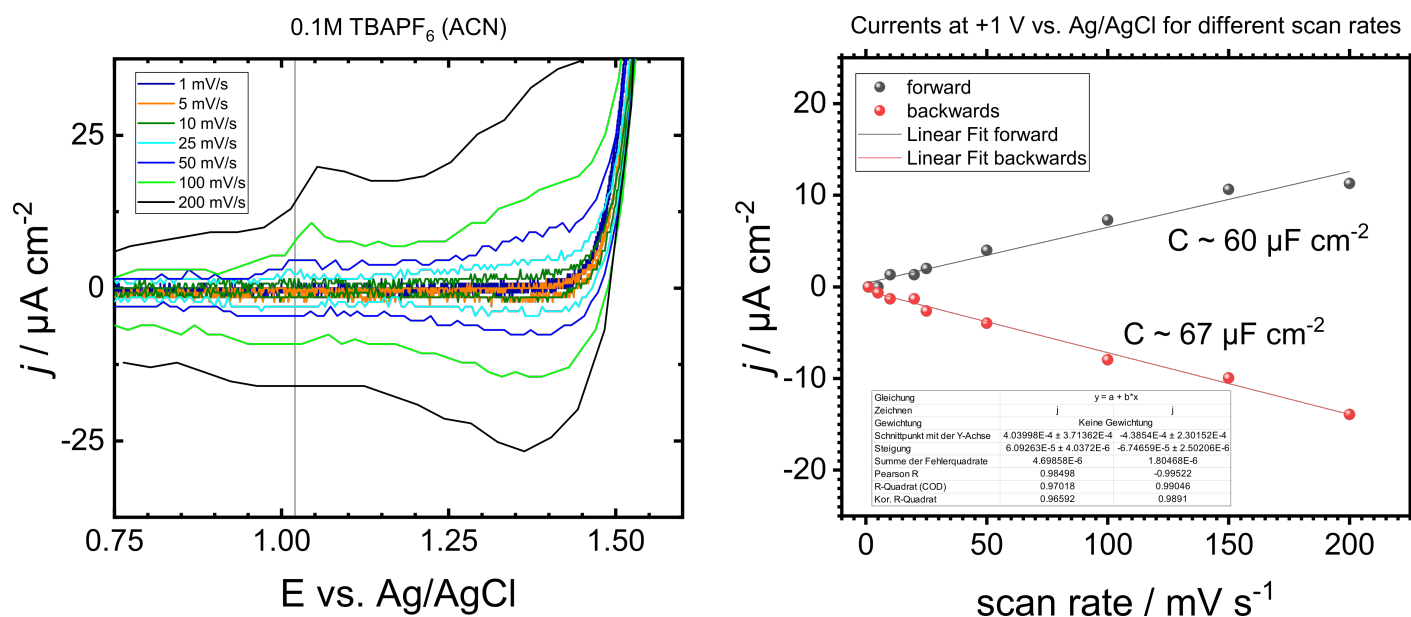

Fig. S16 Current density versus scan rate to determine the electrochemical surface area (ECSA) in organic electrolyte (acetonitrile, 0.1 M TBA-PF<sub>6</sub>). The measurement was performed at the equilibrium potential of the O<sub>2</sub> evolution at +1 V vs. Ag/AgCl (quasi) reference electrode.

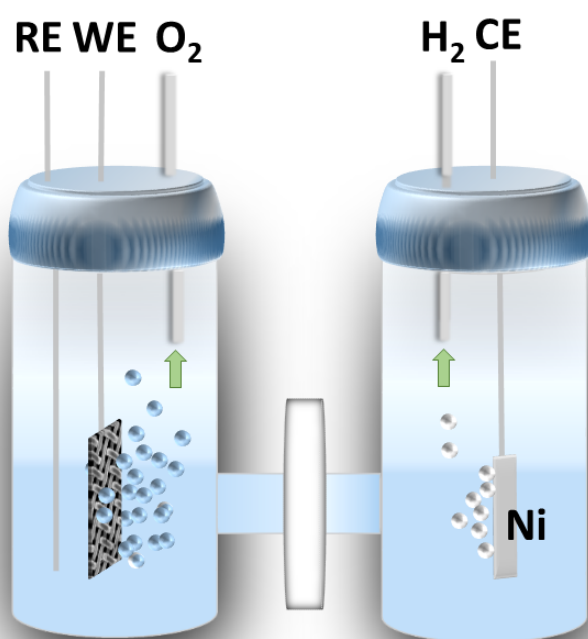

**Fig. S17 Schematic** of the electrochemical H-cell for conducting the electrocatalytic splitting of water.

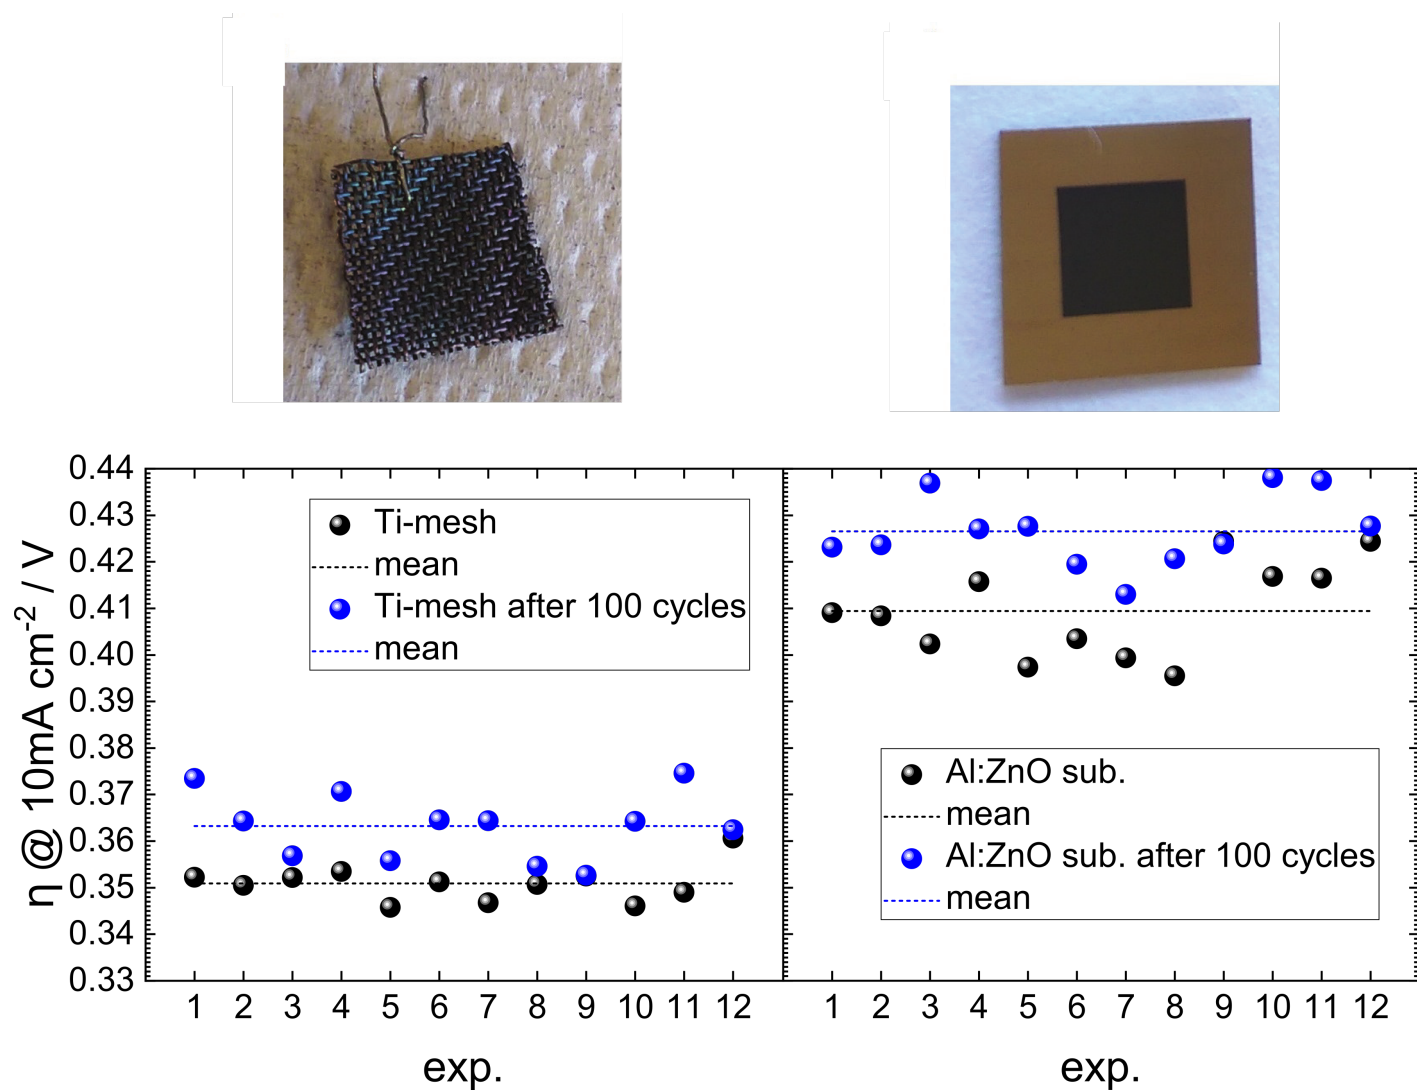

**Fig. S18 Statistical evaluation:** Different experiments on electrocatalytic anodes:  $\text{Zn}_{1.2}\text{Co}_{1.8}\text{O}_{3.5}$  on Ti-mesh and Al:ZnO, respectively.



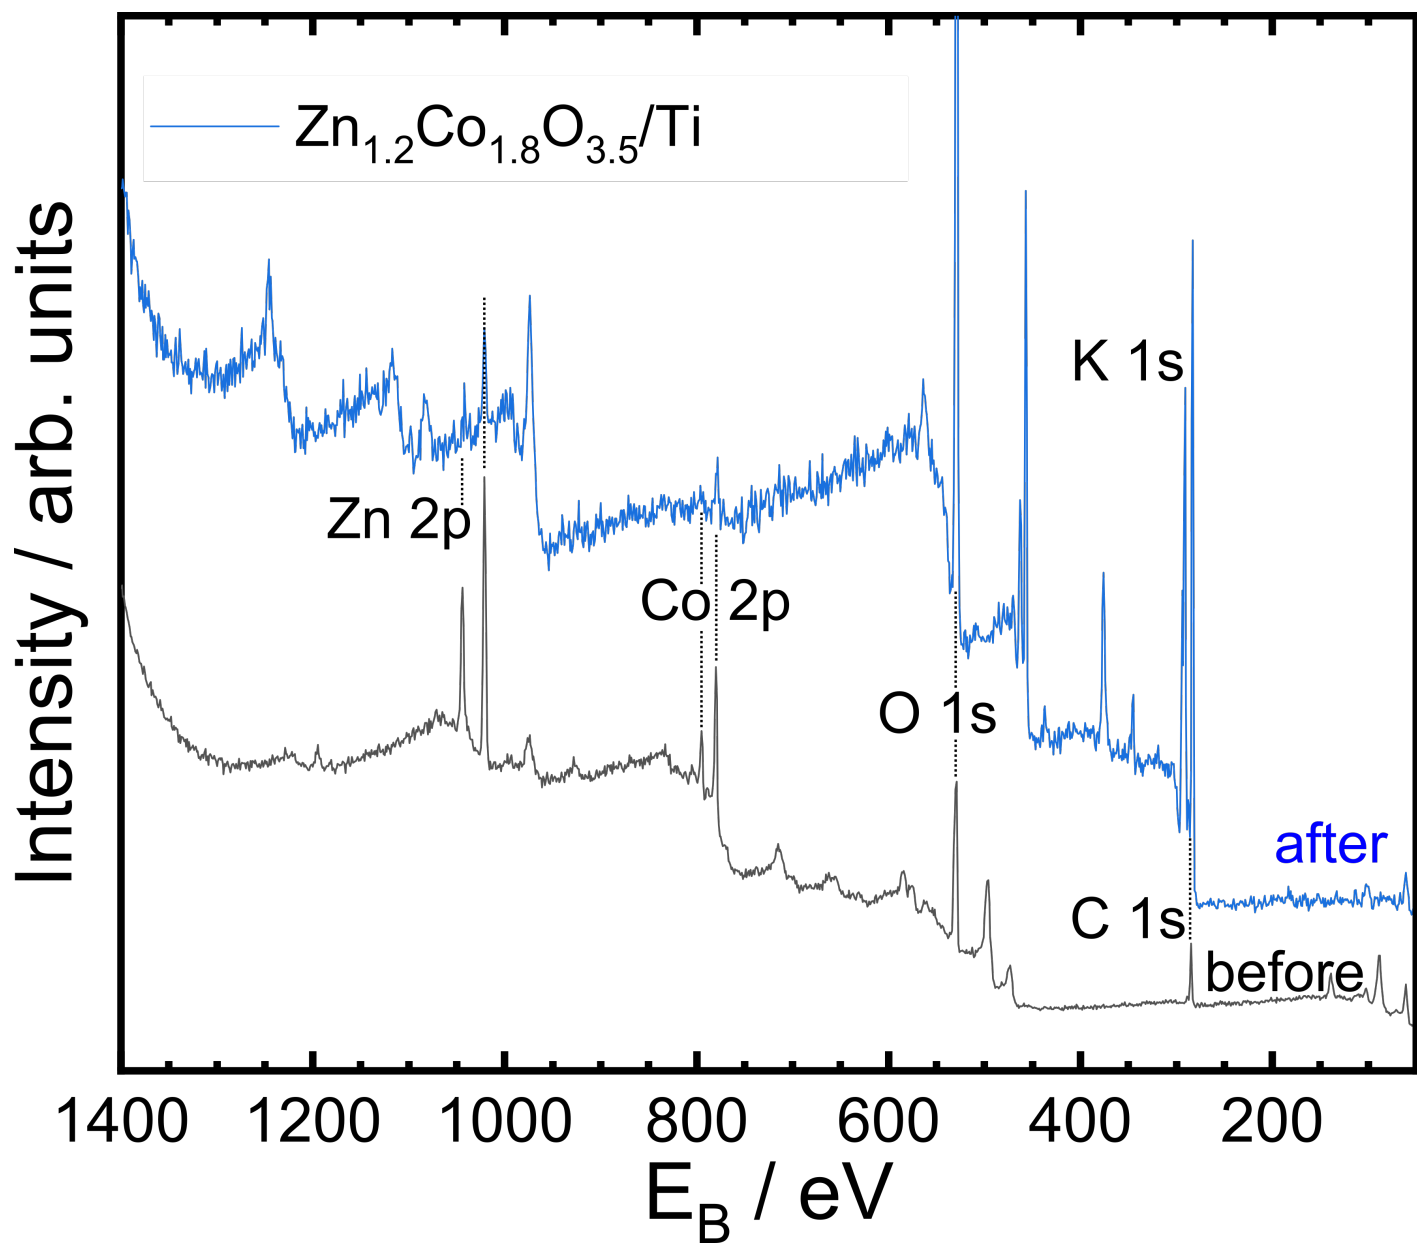

**Fig. S19 XPS survey before/after electrolysis of  $\text{Zn}_{1.2}\text{Co}_{1.8}\text{O}_{3.5}$  on titanium:** surface composition (Zn:Co at  $\approx 0.65$ ) remains similar after electrolysis of  $\text{O}_2$  for 50 h.

### Step 3.1: Hall measurement (at 300K)

#### Run-time operator

#### Sample

|                        |                |
|------------------------|----------------|
| ID:                    | CoZnOx Spinell |
| Type:                  | van der Pauw   |
| Thickness              |                |
| t [nm]:                | 165            |
| Other dimensions       |                |
| Lp [mm]:               |                |
| Hall factor:           | 1              |
| Max voltage [V]:       | 100            |
| Max current [mA]:      | 20             |
| Gate bias voltage [V]: | 0              |

$L_p$  = perimeter length

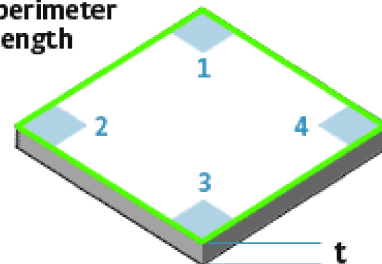

Comment:

#### Final results

|                       |                                                       | Mean value | Limit |
|-----------------------|-------------------------------------------------------|------------|-------|
| $\mu_H$               | Hall mobility [ $\text{cm}^2/\text{V}\cdot\text{s}$ ] | 4.7167E-2  |       |
|                       | Carrier type                                          | P          |       |
| n                     | Carrier concentration [ $1/\text{cm}^3$ ]             | 1.4382E21  |       |
| $n_{\text{sheet}}$    | Sheet carrier concentration [ $1/\text{cm}^2$ ]       | 3.0489E16  |       |
| $R_H$                 | Hall coefficient [ $\text{cm}^3/\text{C}$ ]           | 4.3399E-3  |       |
| $R_{H\text{sheet}}$   | Sheet Hall coefficient [ $\text{cm}^2/\text{C}$ ]     | 2.0471E2   |       |
| $\rho$                | Resistivity [ $\Omega\cdot\text{cm}$ ]                | 9.2011E-2  |       |
| $\rho_{\text{sheet}}$ | Sheet resistivity [ $\Omega/\square$ ]                | 4.3401E3   |       |
| $V_H$                 | Hall voltage [V]                                      | 1.2800E-6  |       |
|                       | Phase [deg.]                                          | -7.7       |       |
|                       | Worst case Ohmic check correlation (1-3)              | 9.9893E-1  |       |

#### Measurement comment

**Fig. S20 Summary of Hall measurement:** A LakeShore 8400 Hall measurement system was used to measure the van der Pauw-type specimen of  $\text{Zn}_{1.2}\text{Co}_{1.8}\text{O}_{3.5}$  grown on sapphire (0001) (here shown at 300K).

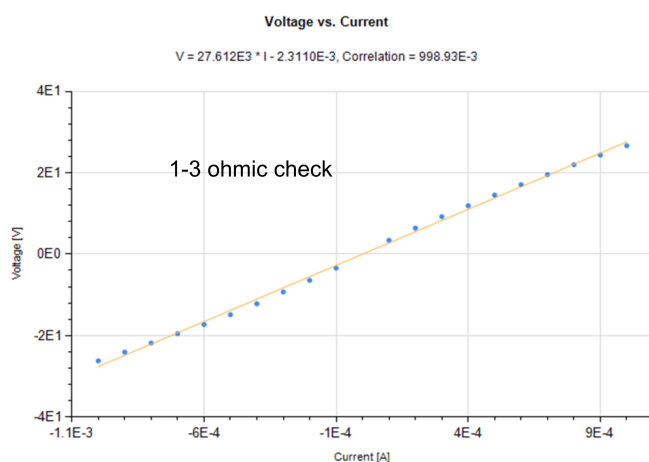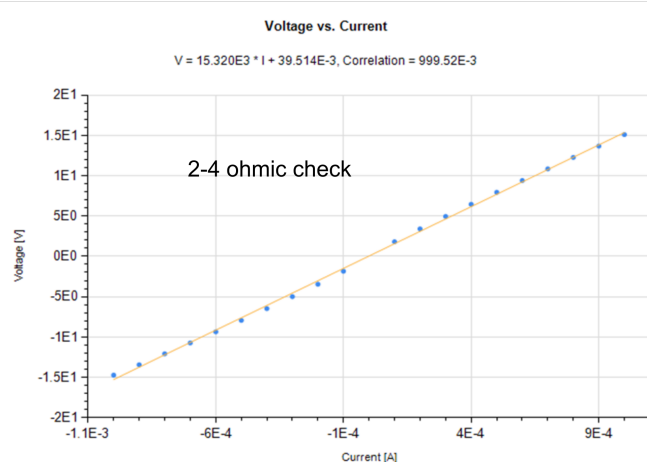

**Fig. S21 Ohmic Check:** Contacting  $\text{Zn}_{1.2}\text{Co}_{1.8}\text{O}_{3.5}$  in the van der Pauw geometry shows ohmic linear behavior.

## Resistivity measurement

### Setup

|                                |                   |
|--------------------------------|-------------------|
| Resistance measurement method: | High resistance   |
| Excitation current             | Manual            |
| Current [mA]:                  | 1                 |
| Current reversal:              | Yes               |
| General                        |                   |
| Sample geometry:               | Geometry averaged |
| Average count:                 | 10                |
| Wait mode:                     | Auto              |
| Measure current lead voltages: | No                |

### Environment

|                       | Start                | Finish               | Average | Status  |
|-----------------------|----------------------|----------------------|---------|---------|
| Date                  | Monday, November 17, | Monday, November 17, |         |         |
| Time                  | 11:26:36 PM          | 11:28:36 PM          |         |         |
| Temperature [K]       | 300.2                | 300.2                | 300.2   | Timeout |
| Field [T]             | 0.0000               | 0.0000               |         |         |
| Gate bias voltage [V] | 0.0000E0             | 0.0000E0             |         |         |
| Gate bias current [A] | 4.3397E-13           | 1.0931E-13           |         |         |

| Final average         |                                        | Geometry A |       | Geometry B |       |
|-----------------------|----------------------------------------|------------|-------|------------|-------|
|                       |                                        | Mean value | Limit | Mean value | Limit |
| $\rho$                | Resistivity [ $\Omega$ -cm]            | 9.2146E-2  |       | 9.1875E-2  |       |
| $\rho_{\text{sheet}}$ | Sheet resistivity [ $\Omega/\square$ ] | 4.3465E3   |       | 4.3337E3   |       |
|                       | F value                                | 0.99       |       | 0.99       |       |

| Intermediate results |                                               | Geometry A |           | Geometry B |           |
|----------------------|-----------------------------------------------|------------|-----------|------------|-----------|
|                      |                                               | R2134      | R3241     | R4312      | R1423     |
|                      | Resistance [ $\Omega$ ]                       | 8.0865E2   | 1.1277E3  | 8.0570E2   | 1.1251E3  |
|                      | Standard deviation of resistance [ $\Omega$ ] | 1.1460E-2  | 1.6047E-2 | 9.8568E-3  | 1.9360E-2 |
|                      | Voltage [V]                                   | 8.0859E-1  | 1.1276E0  | 8.0565E-1  | 1.1250E0  |
|                      | Standard deviation of voltage [V]             | 5.2217E-6  | 6.5738E-6 | 4.2001E-6  | 1.3625E-5 |
|                      | Current [A]                                   | 9.9992E-4  | 9.9991E-4 | 9.9993E-4  | 9.9994E-4 |
|                      | Standard deviation of current [A]             | 1.2614E-8  | 1.2979E-8 | 1.1067E-8  | 1.2222E-8 |

| Average measurements (I+) |                                   | Geometry A |           | Geometry B |           |
|---------------------------|-----------------------------------|------------|-----------|------------|-----------|
|                           |                                   | R2134      | R3241     | R4312      | R1423     |
|                           | Voltage [V]                       | 8.0934E-1  | 1.1291E0  | 8.0427E-1  | 1.1264E0  |
|                           | Standard deviation of voltage [V] | 7.5468E-6  | 8.4175E-6 | 6.9433E-6  | 1.1666E-5 |
|                           | Current [A]                       | 1.0000E-3  | 1.0000E-3 | 1.0000E-3  | 1.0000E-3 |
|                           | Standard deviation of current [A] | 2.1591E-8  | 1.3743E-8 | 1.7665E-8  | 1.7115E-8 |
|                           | Current lead voltage [DC V]       | N/A        | N/A       | N/A        | N/A       |

| Average measurements (I-) |                                   | Geometry A |            | Geometry B |            |
|---------------------------|-----------------------------------|------------|------------|------------|------------|
|                           |                                   | R2134      | R3241      | R4312      | R1423      |
|                           | Voltage [V]                       | -8.0783E-1 | -1.1261E0  | -8.0703E-1 | -1.1237E0  |
|                           | Standard deviation of voltage [V] | 7.2187E-6  | 1.0100E-5  | 4.7278E-6  | 2.4627E-5  |
|                           | Current [A]                       | -9.9983E-4 | -9.9982E-4 | -9.9984E-4 | -9.9985E-4 |
|                           | Standard deviation of current [A] | 1.3048E-8  | 2.2022E-8  | 1.3335E-8  | 1.7453E-8  |
|                           | Current lead voltage [DC V]       | N/A        | N/A        | N/A        | N/A        |

**Fig. S22 Resistivity at 300K:** 8-fold probing in the van der Pauw geometry to obtain the isotropic resistivity of the 165 nm thick  $\text{Zn}_{1.2}\text{Co}_{1.8}\text{O}_{3.5}$  on sapphire.

| AC field Hall measurement                       |                                     |                       |            |            |            |            |           |
|-------------------------------------------------|-------------------------------------|-----------------------|------------|------------|------------|------------|-----------|
| Setup                                           |                                     |                       |            |            |            |            |           |
| Resistance measurement method:                  |                                     | High resistance       |            |            |            |            |           |
| Excitation field                                |                                     |                       |            |            |            |            |           |
| Frequency:                                      |                                     | 100mHz                |            |            |            |            |           |
| Lock-in                                         |                                     |                       |            |            |            |            |           |
| Response:                                       |                                     | Slow                  |            |            |            |            |           |
| Sensitivity:                                    |                                     | 200μV                 |            |            |            |            |           |
| AC gain:                                        |                                     | 48dB                  |            |            |            |            |           |
| Excitation current                              |                                     | Manual                |            |            |            |            |           |
| Current [μA]:                                   |                                     | 100                   |            |            |            |            |           |
| General                                         |                                     |                       |            |            |            |            |           |
| Sample geometry:                                |                                     | Geometry averaged     |            |            |            |            |           |
| Average count:                                  |                                     | 10                    |            |            |            |            |           |
| Wait mode:                                      |                                     | Auto                  |            |            |            |            |           |
| Measure current lead and misalignment voltages: |                                     | No                    |            |            |            |            |           |
| Environment                                     |                                     |                       |            |            |            |            |           |
|                                                 | Start                               | Finish                | Average    | Status     |            |            |           |
| Date                                            | Monday, November 17,                | Tuesday, November 18, |            |            |            |            |           |
| Time                                            | 11:28:37 PM                         | 12:31:51 AM           |            |            |            |            |           |
| Temperature [K]                                 | 300.2                               | 300.2                 | 300.2      | Timeout    |            |            |           |
| Field [T]                                       | 0.6251                              | 0.6251                |            |            |            |            |           |
| Gate bias voltage [V]                           | 0.0000E0                            | 0.0000E0              |            |            |            |            |           |
| Gate bias current [A]                           | 3.3276E-14                          | -8.1799E-14           |            |            |            |            |           |
| Final average                                   |                                     | Geometry C            |            | Geometry D |            |            |           |
|                                                 |                                     | Mean value            | Limit      | Mean value | Limit      |            |           |
| V <sub>H</sub>                                  | Hall voltage [V]                    | 1.2104E-6             |            | 1.3586E-6  |            |            |           |
|                                                 | Carrier type                        | P                     |            | P          |            |            |           |
| n                                               | Carrier concentration [1/cm³]       | 1.5209E21             |            | 1.3550E21  |            |            |           |
| n <sub>sheet</sub>                              | Sheet carrier concentration [1/cm²] | 3.2243E16             |            | 2.8726E16  |            |            |           |
| R <sub>H</sub>                                  | Hall coefficient [cm³/C]            | 4.1039E-3             |            | 4.6062E-3  |            |            |           |
| R <sub>Hsheet</sub>                             | Sheet Hall coefficient [cm²/C]      | 1.9358E2              |            | 2.1728E2   |            |            |           |
| Current reversal results                        |                                     | Geometry C            |            | Geometry D |            |            |           |
|                                                 |                                     | P1-N1                 | P2-N1      | P1-N1      | P2-N1      |            |           |
| V <sub>H</sub>                                  | Hall voltage [V]                    | 1.2255E-6             | 1.1977E-6  | 1.2456E-6  | 1.4734E-6  |            |           |
|                                                 | Phase [deg.]                        | -10.2                 | -15.3      | -5.4       | -1.3       |            |           |
| Average measurements                            |                                     | Geometry C            |            |            | Geometry D |            |           |
|                                                 |                                     | I+(P1)                | I-(N1)     | I+(P2)     | I+(P1)     | I-(N1)     | I+(P2)    |
|                                                 | Voltage [V]                         | 1.7526E-5             | 1.8111E-5  | 1.7328E-5  | 1.1839E-5  | 1.2153E-5  | 1.2051E-5 |
|                                                 | Standard deviation of voltage [V]   | 1.1100E-6             | 7.9734E-7  | 9.6260E-7  | 8.4987E-7  | 1.1740E-6  | 1.2841E-6 |
|                                                 | Phase [deg.]                        | 89.7                  | 97.3       | 90.0       | 85.8       | 97.7       | 83.7      |
|                                                 | Current [A]                         | 1.0004E-4             | -1.0001E-4 | 1.0004E-4  | 1.0004E-4  | -1.0001E-4 | 1.0004E-4 |
|                                                 | Misalignment voltage [DC V]         | N/A                   | N/A        | N/A        | N/A        | N/A        | N/A       |
|                                                 | Current lead voltage [DC V]         | N/A                   | N/A        | N/A        | N/A        | N/A        | N/A       |

**Fig. S23 AC-Hall measurement at 300K:** the AC-Hall method developed by LakeShore (8400 HMS Series) allows to induce an AC-magnetic sinusoidal sweep of the magnetic field (amplitude maximum at 0.91 T, average at 0.6251 T, frequency 100 mHz), while the electric parameters (DC-current, voltage) are measured in DC-mode. Using this, the sensitivity is increased below  $0.7 \cdot 10^{-6}$  V (high-sensitivity Hall voltage probing). Details of the measurements at 300K of the 165 nm thick Zn<sub>1.2</sub>Co<sub>1.8</sub>O<sub>3.5</sub> on sapphire are presented.

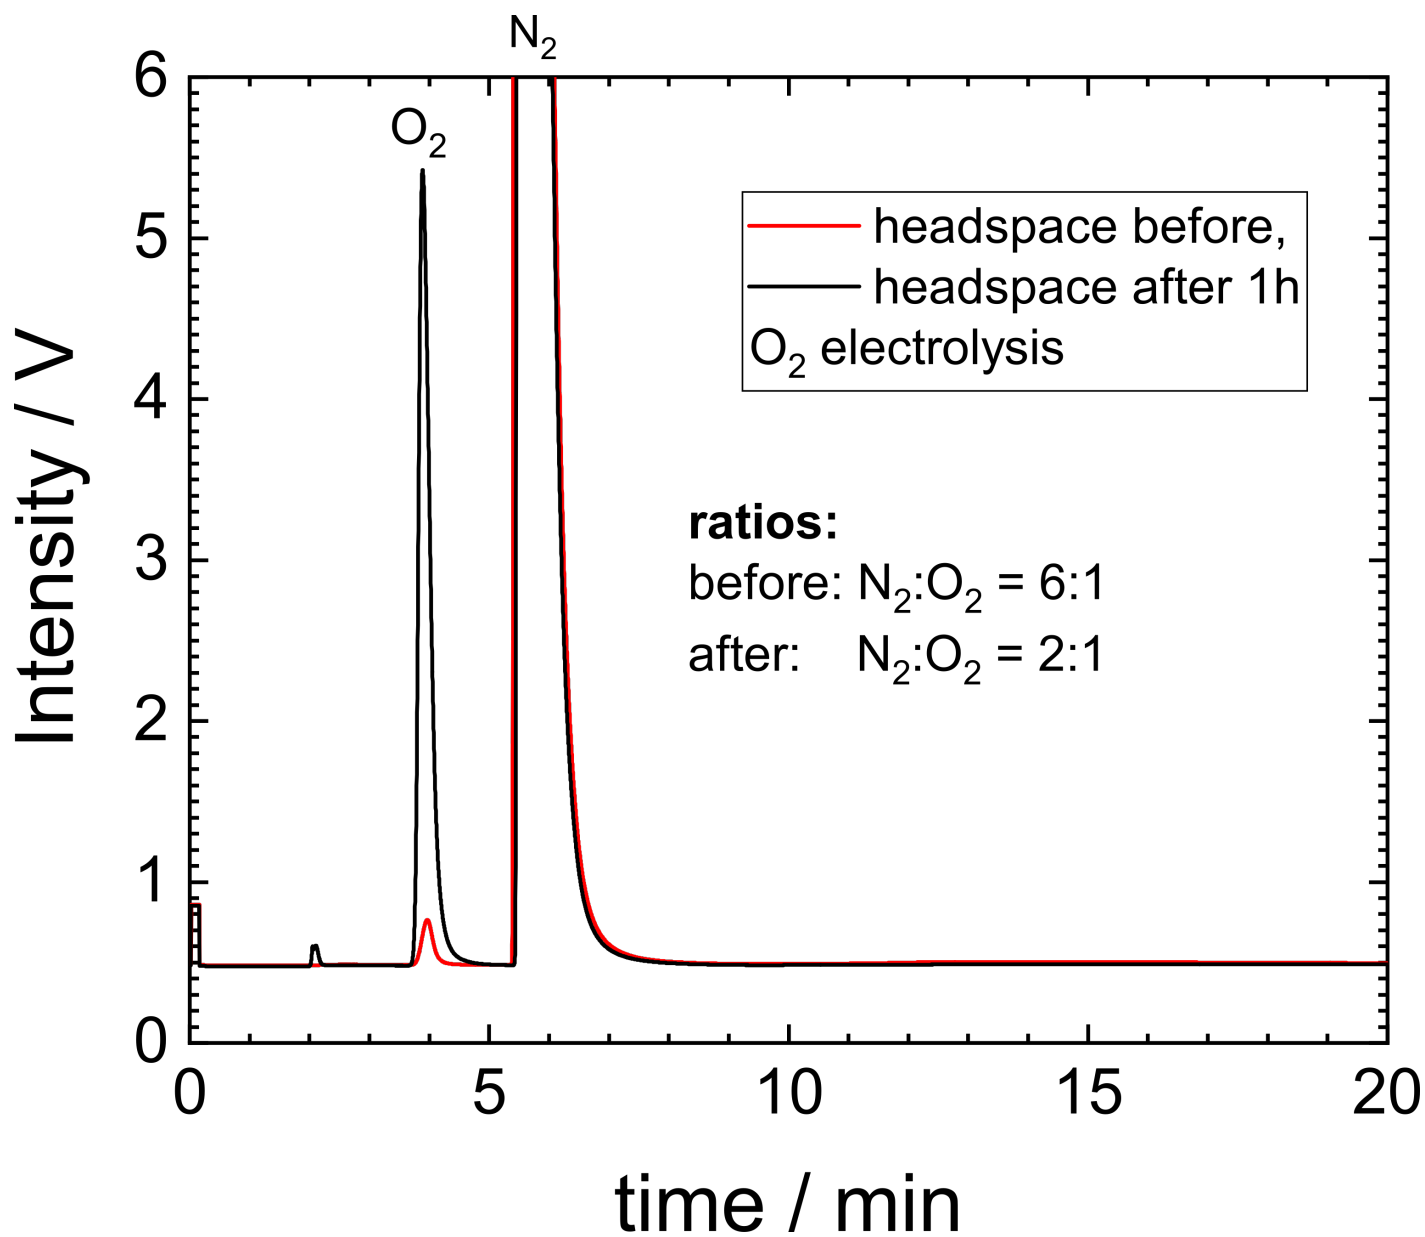

**Fig. S24 Gas-chromatogram (He) of the anode headspace:** Before and after composition of the headspace showing the rise of anodically produced O<sub>2</sub> gas.
